# Supplementary material for: Mechanism of prognostic marker SPOCK3 affecting malignant progression of prostate cancer and construction of prognostic model
Source: PubMed Central journal article supplement (PMC10416445; doi:10.1186/s12885-023-11151-3), 2023-08-11
Supplement: 12885_2023_11151_MOESM1_ESM.pdf [file 12885_2023_11151_MOESM1_ESM.pdf]

Correlation Analysis: revealed 1170 genes with  $|R2| > 0.5$  and  $P < 0.05$  that were thought to be rela

| gene_name | gene_id  | gene_biot  | cor_spear | p_spearman |
|-----------|----------|------------|-----------|------------|
| PKP3      | ENSG0000 | protein_co | -0.59655  | 0          |
| SYNE4     | ENSG0000 | protein_co | -0.56635  | 0          |
| PPP1R14B  | ENSG0000 | protein_co | -0.56041  | 0          |
| FAM71E1   | ENSG0000 | protein_co | -0.55717  | 0          |
| ZMYND19   | ENSG0000 | protein_co | -0.53856  | 0          |
| PTRH2     | ENSG0000 | protein_co | -0.52872  | 0          |
| POLR1C    | ENSG0000 | protein_co | -0.52634  | 0          |
| IPO4      | ENSG0000 | protein_co | -0.52546  | 0          |
| CACFD1    | ENSG0000 | protein_co | -0.52539  | 0          |
| METTL1    | ENSG0000 | protein_co | -0.52041  | 0          |
| NIT2      | ENSG0000 | protein_co | -0.51954  | 0          |
| RRP9      | ENSG0000 | protein_co | -0.51938  | 0          |
| TEDC2     | ENSG0000 | protein_co | -0.51891  | 0          |
| PDCD2L    | ENSG0000 | protein_co | -0.51776  | 0          |
| TOMM40    | ENSG0000 | protein_co | -0.51624  | 0          |
| SRM       | ENSG0000 | protein_co | -0.51595  | 0          |
| NME1      | ENSG0000 | protein_co | -0.51436  | 0          |
| RHPN1     | ENSG0000 | protein_co | -0.51414  | 0          |
| FLAD1     | ENSG0000 | protein_co | -0.51385  | 0          |
| MRTO4     | ENSG0000 | protein_co | -0.51287  | 0          |
| SLC25A33  | ENSG0000 | protein_co | -0.51157  | 0          |
| SLC25A10  | ENSG0000 | protein_co | -0.51123  | 0          |
| SLC25A22  | ENSG0000 | protein_co | -0.51115  | 0          |
| SLC25A39  | ENSG0000 | protein_co | -0.50705  | 0          |
| PYCR3     | ENSG0000 | protein_co | -0.5065   | 0          |
| TRAF4     | ENSG0000 | protein_co | -0.50357  | 0          |
| AP1M2     | ENSG0000 | protein_co | -0.50341  | 0          |
| POLD2     | ENSG0000 | protein_co | -0.5006   | 0          |
| TSPAN7    | ENSG0000 | protein_co | 0.50002   | 0          |
| PTN       | ENSG0000 | protein_co | 0.500098  | 0          |
| TUBB6     | ENSG0000 | protein_co | 0.500405  | 0          |
| MICU3     | ENSG0000 | protein_co | 0.50055   | 0          |
| P2RX7     | ENSG0000 | protein_co | 0.500608  | 0          |
| ITGB8     | ENSG0000 | protein_co | 0.500634  | 0          |
| CTSK      | ENSG0000 | protein_co | 0.500682  | 0          |
| PDGFD     | ENSG0000 | protein_co | 0.500745  | 0          |
| SORBS2    | ENSG0000 | protein_co | 0.50099   | 0          |
| GNA14     | ENSG0000 | protein_co | 0.50108   | 0          |
| GLIS3     | ENSG0000 | protein_co | 0.50125   | 0          |
| NELL2     | ENSG0000 | protein_co | 0.501536  | 0          |
| LPA       | ENSG0000 | protein_co | 0.501872  | 3.41E-33   |
| MAGI2     | ENSG0000 | protein_co | 0.501941  | 0          |
| DOK4      | ENSG0000 | protein_co | 0.502086  | 0          |
| CD99L2    | ENSG0000 | protein_co | 0.502496  | 0          |
| PPM1L     | ENSG0000 | protein_co | 0.502555  | 0          |
| FOXJ2     | ENSG0000 | protein_co | 0.503187  | 0          |
| FBLN2     | ENSG0000 | protein_co | 0.503325  | 0          |
| LACC1     | ENSG0000 | protein_co | 0.503502  | 0          |
| CC2D2A    | ENSG0000 | protein_co | 0.503512  | 0          |
| ENTPD1    | ENSG0000 | protein_co | 0.503611  | 0          |
| INKA2     | ENSG0000 | protein_co | 0.503634  | 0          |
| SNX7      | ENSG0000 | protein_co | 0.503638  | 0          |
| RAP1A     | ENSG0000 | protein_co | 0.503734  | 0          |
| GLRB      | ENSG0000 | protein_co | 0.503794  | 0          |
| CSPG4     | ENSG0000 | protein_co | 0.5038    | 0          |
| MLC1      | ENSG0000 | protein_co | 0.503988  | 0          |

|          |          |            |          |          |
|----------|----------|------------|----------|----------|
| COL5A1   | ENSG0000 | protein_co | 0.504017 | 0        |
| ARSI     | ENSG0000 | protein_co | 0.504428 | 0        |
| UNC5B    | ENSG0000 | protein_co | 0.504596 | 0        |
| SULF1    | ENSG0000 | protein_co | 0.504854 | 0        |
| FAM153A  | ENSG0000 | protein_co | 0.50504  | 0        |
| FBXL7    | ENSG0000 | protein_co | 0.505058 | 0        |
| MYOZ2    | ENSG0000 | protein_co | 0.505072 | 1.16E-33 |
| ZNF454   | ENSG0000 | protein_co | 0.505161 | 0        |
| SEMA3C   | ENSG0000 | protein_co | 0.505372 | 0        |
| UNC5C    | ENSG0000 | protein_co | 0.505403 | 0        |
| ELF1     | ENSG0000 | protein_co | 0.505494 | 0        |
| COLGALT2 | ENSG0000 | protein_co | 0.505526 | 0        |
| WDR1     | ENSG0000 | protein_co | 0.505683 | 0        |
| WIF1     | ENSG0000 | protein_co | 0.505701 | 9.37E-34 |
| LCP2     | ENSG0000 | protein_co | 0.505789 | 0        |
| DCC      | ENSG0000 | protein_co | 0.50579  | 9.09E-34 |
| KLHL4    | ENSG0000 | protein_co | 0.505886 | 8.8E-34  |
| SGTB     | ENSG0000 | protein_co | 0.506239 | 0        |
| GLIPR1   | ENSG0000 | protein_co | 0.506276 | 0        |
| PCDHGB7  | ENSG0000 | protein_co | 0.506661 | 0        |
| NFE2L2   | ENSG0000 | protein_co | 0.506727 | 0        |
| PARD6G   | ENSG0000 | protein_co | 0.507241 | 0        |
| GYPC     | ENSG0000 | protein_co | 0.507444 | 0        |
| AJUBA    | ENSG0000 | protein_co | 0.507477 | 0        |
| CALHM2   | ENSG0000 | protein_co | 0.507582 | 0        |
| IDS      | ENSG0000 | protein_co | 0.507664 | 0        |
| FAM83B   | ENSG0000 | protein_co | 0.507695 | 4.75E-34 |
| FAM153B  | ENSG0000 | protein_co | 0.507828 | 0        |
| NTN1     | ENSG0000 | protein_co | 0.507832 | 0        |
| TENT5B   | ENSG0000 | protein_co | 0.507844 | 0        |
| GSTM4    | ENSG0000 | protein_co | 0.508166 | 0        |
| THSD7B   | ENSG0000 | protein_co | 0.508178 | 4.02E-34 |
| ERAP1    | ENSG0000 | protein_co | 0.508183 | 0        |
| QKI      | ENSG0000 | protein_co | 0.508333 | 0        |
| COL4A3   | ENSG0000 | protein_co | 0.508591 | 0        |
| COL16A1  | ENSG0000 | protein_co | 0.508633 | 0        |
| BMP5     | ENSG0000 | protein_co | 0.508838 | 3.21E-34 |
| SLFN11   | ENSG0000 | protein_co | 0.508867 | 0        |
| CEND1    | ENSG0000 | protein_co | 0.509027 | 0        |
| SLC27A6  | ENSG0000 | protein_co | 0.509176 | 2.86E-34 |
| HLA-DOA  | ENSG0000 | protein_co | 0.509263 | 0        |
| ARHGEF9  | ENSG0000 | protein_co | 0.509325 | 0        |
| COL6A2   | ENSG0000 | protein_co | 0.509827 | 0        |
| CREBRF   | ENSG0000 | protein_co | 0.510331 | 0        |
| MIXL1    | ENSG0000 | protein_co | 0.510365 | 1.9E-34  |
| CYYR1    | ENSG0000 | protein_co | 0.510431 | 0        |
| GALNT9   | ENSG0000 | protein_co | 0.510493 | 1.82E-34 |
| AHR      | ENSG0000 | protein_co | 0.510513 | 0        |
| RAB37    | ENSG0000 | protein_co | 0.510621 | 0        |
| CCSER2   | ENSG0000 | protein_co | 0.510989 | 0        |
| FRMPD4   | ENSG0000 | protein_co | 0.511265 | 1.39E-34 |
| NFIA     | ENSG0000 | protein_co | 0.511267 | 0        |
| NXPH3    | ENSG0000 | protein_co | 0.511618 | 0        |
| SULT1C4  | ENSG0000 | protein_co | 0.512062 | 0        |
| LPCAT2   | ENSG0000 | protein_co | 0.512284 | 0        |
| GDF7     | ENSG0000 | protein_co | 0.512614 | 0        |
| RASA3    | ENSG0000 | protein_co | 0.51268  | 0        |
| ARHGAP31 | ENSG0000 | protein_co | 0.512746 | 0        |

|          |          |            |          |          |
|----------|----------|------------|----------|----------|
| NEK7     | ENSG0000 | protein_co | 0.513202 | 0        |
| PLS3     | ENSG0000 | protein_co | 0.51323  | 0        |
| TAGAP    | ENSG0000 | protein_co | 0.513301 | 0        |
| HTR7     | ENSG0000 | protein_co | 0.51333  | 6.79E-35 |
| HMG20A   | ENSG0000 | protein_co | 0.513383 | 0        |
| FRMD3    | ENSG0000 | protein_co | 0.513394 | 0        |
| LPIN1    | ENSG0000 | protein_co | 0.513715 | 0        |
| IGFBP5   | ENSG0000 | protein_co | 0.513715 | 0        |
| FGL2     | ENSG0000 | protein_co | 0.51391  | 0        |
| KIAA1210 | ENSG0000 | protein_co | 0.513912 | 0        |
| CD40     | ENSG0000 | protein_co | 0.513915 | 0        |
| CD200    | ENSG0000 | protein_co | 0.514004 | 0        |
| PLCD4    | ENSG0000 | protein_co | 0.514012 | 0        |
| PID1     | ENSG0000 | protein_co | 0.514137 | 0        |
| RFTN2    | ENSG0000 | protein_co | 0.51427  | 0        |
| MAP7D3   | ENSG0000 | protein_co | 0.514861 | 0        |
| NACC2    | ENSG0000 | protein_co | 0.514933 | 0        |
| TGFB3    | ENSG0000 | protein_co | 0.514962 | 0        |
| ZMAT3    | ENSG0000 | protein_co | 0.514998 | 0        |
| RGS18    | ENSG0000 | protein_co | 0.51507  | 3.7E-35  |
| STK26    | ENSG0000 | protein_co | 0.51544  | 0        |
| TAF3     | ENSG0000 | protein_co | 0.515452 | 0        |
| TMEM108  | ENSG0000 | protein_co | 0.51588  | 0        |
| SLC2A9   | ENSG0000 | protein_co | 0.515905 | 0        |
| ANTXR2   | ENSG0000 | protein_co | 0.515918 | 0        |
| ERVFRD-1 | ENSG0000 | protein_co | 0.516356 | 2.35E-35 |
| KLHL30   | ENSG0000 | protein_co | 0.516472 | 0        |
| MPDZ     | ENSG0000 | protein_co | 0.516535 | 0        |
| RNASEL   | ENSG0000 | protein_co | 0.516594 | 0        |
| CMTM5    | ENSG0000 | protein_co | 0.516736 | 2.06E-35 |
| TMIE     | ENSG0000 | protein_co | 0.516766 | 2.04E-35 |
| SPOP     | ENSG0000 | protein_co | 0.516775 | 0        |
| MAOB     | ENSG0000 | protein_co | 0.517263 | 0        |
| GATA5    | ENSG0000 | protein_co | 0.517288 | 1.7E-35  |
| ROBO2    | ENSG0000 | protein_co | 0.517404 | 0        |
| RGS4     | ENSG0000 | protein_co | 0.517457 | 0        |
| TNXB     | ENSG0000 | protein_co | 0.51755  | 0        |
| ARHGAP24 | ENSG0000 | protein_co | 0.517596 | 0        |
| RUNDC3B  | ENSG0000 | protein_co | 0.51772  | 0        |
| SMTN     | ENSG0000 | protein_co | 0.518126 | 0        |
| ACTC1    | ENSG0000 | protein_co | 0.51836  | 0        |
| SEMA3D   | ENSG0000 | protein_co | 0.518437 | 0        |
| PPP3CB   | ENSG0000 | protein_co | 0.518561 | 0        |
| CCN4     | ENSG0000 | protein_co | 0.518634 | 0        |
| TMEM71   | ENSG0000 | protein_co | 0.51869  | 0        |
| ITGB1    | ENSG0000 | protein_co | 0.518693 | 0        |
| TFPI     | ENSG0000 | protein_co | 0.51881  | 0        |
| FGFR2    | ENSG0000 | protein_co | 0.519106 | 0        |
| CAMK1D   | ENSG0000 | protein_co | 0.519163 | 0        |
| PHYHIP   | ENSG0000 | protein_co | 0.519379 | 0        |
| NLRP1    | ENSG0000 | protein_co | 0.519433 | 0        |
| GBP6     | ENSG0000 | protein_co | 0.519696 | 7.23E-36 |
| ZBTB38   | ENSG0000 | protein_co | 0.519752 | 0        |
| SLC46A3  | ENSG0000 | protein_co | 0.519798 | 0        |
| TTYH2    | ENSG0000 | protein_co | 0.51983  | 0        |
| MPO      | ENSG0000 | protein_co | 0.519848 | 6.84E-36 |
| COL17A1  | ENSG0000 | protein_co | 0.519873 | 0        |
| PTGER3   | ENSG0000 | protein_co | 0.5204   | 0        |

|          |          |            |          |          |
|----------|----------|------------|----------|----------|
| ADD1     | ENSG0000 | protein_co | 0.520448 | 0        |
| IGF2     | ENSG0000 | protein_co | 0.520516 | 0        |
| COL4A2   | ENSG0000 | protein_co | 0.520849 | 0        |
| DOC2B    | ENSG0000 | protein_co | 0.521176 | 0        |
| NLGN4Y   | ENSG0000 | protein_co | 0.521259 | 0        |
| GCOM1    | ENSG0000 | protein_co | 0.521387 | 3.95E-36 |
| NCS1     | ENSG0000 | protein_co | 0.521402 | 0        |
| C21orf62 | ENSG0000 | protein_co | 0.521428 | 3.89E-36 |
| XPNPEP2  | ENSG0000 | protein_co | 0.521493 | 3.8E-36  |
| CEP112   | ENSG0000 | protein_co | 0.521755 | 0        |
| CCDC82   | ENSG0000 | protein_co | 0.521861 | 0        |
| FZD1     | ENSG0000 | protein_co | 0.521896 | 0        |
| AJAP1    | ENSG0000 | protein_co | 0.522078 | 0        |
| SFXN3    | ENSG0000 | protein_co | 0.522312 | 0        |
| FGD5     | ENSG0000 | protein_co | 0.522468 | 0        |
| EPB41L1  | ENSG0000 | protein_co | 0.52297  | 0        |
| SGCA     | ENSG0000 | protein_co | 0.523123 | 0        |
| FCER1A   | ENSG0000 | protein_co | 0.523375 | 0        |
| CLEC9A   | ENSG0000 | protein_co | 0.523383 | 1.93E-36 |
| TLR1     | ENSG0000 | protein_co | 0.523476 | 0        |
| CDC42EP4 | ENSG0000 | protein_co | 0.523933 | 0        |
| HOXD11   | ENSG0000 | protein_co | 0.524061 | 1.51E-36 |
| PARM1    | ENSG0000 | protein_co | 0.524213 | 0        |
| SH3GLB1  | ENSG0000 | protein_co | 0.524223 | 0        |
| PRIMA1   | ENSG0000 | protein_co | 0.524348 | 0        |
| GPLD1    | ENSG0000 | protein_co | 0.52453  | 0        |
| HSPA4L   | ENSG0000 | protein_co | 0.524721 | 0        |
| CCDC136  | ENSG0000 | protein_co | 0.524858 | 0        |
| SGCE     | ENSG0000 | protein_co | 0.525261 | 0        |
| PPP1R3B  | ENSG0000 | protein_co | 0.525263 | 0        |
| TRPS1    | ENSG0000 | protein_co | 0.525266 | 0        |
| PCDHB15  | ENSG0000 | protein_co | 0.525367 | 0        |
| PTH1R    | ENSG0000 | protein_co | 0.525395 | 0        |
| TEX26    | ENSG0000 | protein_co | 0.525399 | 9.32E-37 |
| FYCO1    | ENSG0000 | protein_co | 0.525448 | 0        |
| EFNB1    | ENSG0000 | protein_co | 0.525605 | 0        |
| GCK      | ENSG0000 | protein_co | 0.525672 | 0        |
| SIGLEC6  | ENSG0000 | protein_co | 0.525673 | 8.44E-37 |
| GDF10    | ENSG0000 | protein_co | 0.525685 | 8.4E-37  |
| IQCA1    | ENSG0000 | protein_co | 0.525702 | 0        |
| GAB2     | ENSG0000 | protein_co | 0.525941 | 0        |
| GLCE     | ENSG0000 | protein_co | 0.526645 | 0        |
| ZNF385D  | ENSG0000 | protein_co | 0.526841 | 0        |
| NR3C2    | ENSG0000 | protein_co | 0.527129 | 0        |
| C1R      | ENSG0000 | protein_co | 0.527372 | 0        |
| SSC5D    | ENSG0000 | protein_co | 0.52741  | 0        |
| GEM      | ENSG0000 | protein_co | 0.527539 | 0        |
| TRIM22   | ENSG0000 | protein_co | 0.527549 | 0        |
| CA14     | ENSG0000 | protein_co | 0.527847 | 0        |
| RBMS2    | ENSG0000 | protein_co | 0.527915 | 0        |
| CYP27A1  | ENSG0000 | protein_co | 0.528095 | 0        |
| CHST6    | ENSG0000 | protein_co | 0.528104 | 0        |
| FER      | ENSG0000 | protein_co | 0.528265 | 0        |
| MED21    | ENSG0000 | protein_co | 0.528571 | 0        |
| PRDM8    | ENSG0000 | protein_co | 0.529053 | 0        |
| LIMS2    | ENSG0000 | protein_co | 0.529341 | 0        |
| PAQR8    | ENSG0000 | protein_co | 0.529349 | 0        |
| KANK4    | ENSG0000 | protein_co | 0.529421 | 0        |

|          |          |            |          |          |
|----------|----------|------------|----------|----------|
| ARMC4    | ENSG0000 | protein_co | 0.529421 | 0        |
| FAM13B   | ENSG0000 | protein_co | 0.529508 | 0        |
| APOBEC3C | ENSG0000 | protein_co | 0.529605 | 0        |
| OPN1SW   | ENSG0000 | protein_co | 0.529606 | 0        |
| NR3C1    | ENSG0000 | protein_co | 0.529679 | 0        |
| MCAM     | ENSG0000 | protein_co | 0.529721 | 0        |
| DTNA     | ENSG0000 | protein_co | 0.529907 | 0        |
| AVPR1A   | ENSG0000 | protein_co | 0.529925 | 0        |
| CHODL    | ENSG0000 | protein_co | 0.530102 | 0        |
| SOX15    | ENSG0000 | protein_co | 0.530199 | 0        |
| SOSTDC1  | ENSG0000 | protein_co | 0.530285 | 1.56E-37 |
| CYGB     | ENSG0000 | protein_co | 0.530318 | 0        |
| RSU1     | ENSG0000 | protein_co | 0.53039  | 0        |
| TRABD2B  | ENSG0000 | protein_co | 0.530496 | 0        |
| PDGFRB   | ENSG0000 | protein_co | 0.530606 | 0        |
| WNT2B    | ENSG0000 | protein_co | 0.530624 | 0        |
| ERC1     | ENSG0000 | protein_co | 0.530666 | 0        |
| F8       | ENSG0000 | protein_co | 0.530856 | 0        |
| ANTXR1   | ENSG0000 | protein_co | 0.530867 | 0        |
| DSCAML1  | ENSG0000 | protein_co | 0.531079 | 1.17E-37 |
| GNB5     | ENSG0000 | protein_co | 0.531108 | 0        |
| DPY19L1  | ENSG0000 | protein_co | 0.531276 | 0        |
| MYORG    | ENSG0000 | protein_co | 0.531306 | 0        |
| TSHZ2    | ENSG0000 | protein_co | 0.531404 | 0        |
| GSDME    | ENSG0000 | protein_co | 0.531633 | 0        |
| FBXL22   | ENSG0000 | protein_co | 0.531798 | 0        |
| FEZ2     | ENSG0000 | protein_co | 0.531807 | 0        |
| MYL9     | ENSG0000 | protein_co | 0.531909 | 0        |
| STK33    | ENSG0000 | protein_co | 0.532265 | 0        |
| PTPN14   | ENSG0000 | protein_co | 0.532728 | 0        |
| ANKRD45  | ENSG0000 | protein_co | 0.532818 | 6.12E-38 |
| CASQ1    | ENSG0000 | protein_co | 0.533127 | 0        |
| ENPP6    | ENSG0000 | protein_co | 0.533435 | 0        |
| HOXA7    | ENSG0000 | protein_co | 0.533558 | 4.64E-38 |
| PHACTR2  | ENSG0000 | protein_co | 0.533799 | 0        |
| EBF1     | ENSG0000 | protein_co | 0.533971 | 0        |
| ATP10D   | ENSG0000 | protein_co | 0.53415  | 0        |
| ANP32E   | ENSG0000 | protein_co | 0.53421  | 0        |
| CXCL12   | ENSG0000 | protein_co | 0.534279 | 0        |
| FHL2     | ENSG0000 | protein_co | 0.534295 | 0        |
| CCDC27   | ENSG0000 | protein_co | 0.53435  | 3.46E-38 |
| TMEM169  | ENSG0000 | protein_co | 0.534362 | 3.44E-38 |
| CKMT2    | ENSG0000 | protein_co | 0.534581 | 0        |
| PLCG2    | ENSG0000 | protein_co | 0.534738 | 0        |
| RAB7B    | ENSG0000 | protein_co | 0.535246 | 0        |
| GBP1     | ENSG0000 | protein_co | 0.535263 | 0        |
| ZNF25    | ENSG0000 | protein_co | 0.535379 | 0        |
| SDC3     | ENSG0000 | protein_co | 0.535608 | 0        |
| ASAP1    | ENSG0000 | protein_co | 0.535685 | 0        |
| SSX2IP   | ENSG0000 | protein_co | 0.535922 | 0        |
| ZNF469   | ENSG0000 | protein_co | 0.535973 | 0        |
| DSTN     | ENSG0000 | protein_co | 0.536109 | 0        |
| SSBP2    | ENSG0000 | protein_co | 0.536211 | 0        |
| SPRY1    | ENSG0000 | protein_co | 0.536531 | 0        |
| PGRMC1   | ENSG0000 | protein_co | 0.536992 | 0        |
| DES      | ENSG0000 | protein_co | 0.537429 | 0        |
| ITGA2    | ENSG0000 | protein_co | 0.537566 | 0        |
| VSIR     | ENSG0000 | protein_co | 0.537674 | 0        |

|          |          |            |          |          |
|----------|----------|------------|----------|----------|
| COL8A2   | ENSG0000 | protein_co | 0.537682 | 0        |
| NPTN     | ENSG0000 | protein_co | 0.538144 | 0        |
| ROCK2    | ENSG0000 | protein_co | 0.538921 | 0        |
| FRMD7    | ENSG0000 | protein_co | 0.539015 | 5.97E-39 |
| MYADM    | ENSG0000 | protein_co | 0.539087 | 0        |
| MOXD1    | ENSG0000 | protein_co | 0.539104 | 0        |
| CPVL     | ENSG0000 | protein_co | 0.539338 | 0        |
| GFOD1    | ENSG0000 | protein_co | 0.539347 | 0        |
| CORIN    | ENSG0000 | protein_co | 0.539521 | 0        |
| LGI3     | ENSG0000 | protein_co | 0.539653 | 4.68E-39 |
| ZCCHC12  | ENSG0000 | protein_co | 0.539929 | 4.22E-39 |
| EPS8     | ENSG0000 | protein_co | 0.54003  | 0        |
| CFAP221  | ENSG0000 | protein_co | 0.540033 | 4.05E-39 |
| MET      | ENSG0000 | protein_co | 0.540302 | 0        |
| ARHGEF17 | ENSG0000 | protein_co | 0.54034  | 0        |
| WNT2     | ENSG0000 | protein_co | 0.54044  | 0        |
| CMYA5    | ENSG0000 | protein_co | 0.540533 | 0        |
| SSTR2    | ENSG0000 | protein_co | 0.540593 | 0        |
| NREP     | ENSG0000 | protein_co | 0.540879 | 0        |
| PIPOX    | ENSG0000 | protein_co | 0.540889 | 0        |
| BEST1    | ENSG0000 | protein_co | 0.540937 | 0        |
| SLC40A1  | ENSG0000 | protein_co | 0.541044 | 0        |
| PAK5     | ENSG0000 | protein_co | 0.541102 | 2.7E-39  |
| PEG3     | ENSG0000 | protein_co | 0.541138 | 0        |
| ZFP92    | ENSG0000 | protein_co | 0.541172 | 0        |
| GBP2     | ENSG0000 | protein_co | 0.541417 | 0        |
| CPA3     | ENSG0000 | protein_co | 0.541785 | 0        |
| CHST11   | ENSG0000 | protein_co | 0.541917 | 0        |
| MRAP2    | ENSG0000 | protein_co | 0.542251 | 0        |
| VAMP3    | ENSG0000 | protein_co | 0.542289 | 0        |
| ZNF365   | ENSG0000 | protein_co | 0.542526 | 0        |
| ZBTB4    | ENSG0000 | protein_co | 0.542726 | 0        |
| ADA2     | ENSG0000 | protein_co | 0.542995 | 0        |
| VIT      | ENSG0000 | protein_co | 0.5432   | 0        |
| CAMK2A   | ENSG0000 | protein_co | 0.543331 | 1.15E-39 |
| RPE65    | ENSG0000 | protein_co | 0.543349 | 1.14E-39 |
| PCSK7    | ENSG0000 | protein_co | 0.543352 | 0        |
| SULF2    | ENSG0000 | protein_co | 0.543473 | 0        |
| ITGB1BP2 | ENSG0000 | protein_co | 0.543893 | 0        |
| GAS1     | ENSG0000 | protein_co | 0.544152 | 0        |
| KLF12    | ENSG0000 | protein_co | 0.544611 | 0        |
| MYZAP    | ENSG0000 | protein_co | 0.544736 | 0        |
| NACAD    | ENSG0000 | protein_co | 0.544774 | 0        |
| TMEM43   | ENSG0000 | protein_co | 0.545013 | 0        |
| ELANE    | ENSG0000 | protein_co | 0.545052 | 5.9E-40  |
| DRD5     | ENSG0000 | protein_co | 0.545055 | 5.9E-40  |
| OGFRL1   | ENSG0000 | protein_co | 0.545088 | 0        |
| PIK3C2G  | ENSG0000 | protein_co | 0.545261 | 5.44E-40 |
| ZNF208   | ENSG0000 | protein_co | 0.545296 | 5.37E-40 |
| SLC14A1  | ENSG0000 | protein_co | 0.545372 | 0        |
| PCDHGC3  | ENSG0000 | protein_co | 0.545458 | 0        |
| ANKRD53  | ENSG0000 | protein_co | 0.546063 | 0        |
| CRYAB    | ENSG0000 | protein_co | 0.546986 | 0        |
| ROBO1    | ENSG0000 | protein_co | 0.546989 | 0        |
| FOXP2    | ENSG0000 | protein_co | 0.547722 | 0        |
| P2RY12   | ENSG0000 | protein_co | 0.547803 | 2.02E-40 |
| NTRK1    | ENSG0000 | protein_co | 0.547865 | 0        |
| B4GALT6  | ENSG0000 | protein_co | 0.548029 | 0        |

|          |          |            |          |          |
|----------|----------|------------|----------|----------|
| JAM3     | ENSG0000 | protein_co | 0.548411 | 0        |
| KCNIP3   | ENSG0000 | protein_co | 0.548578 | 0        |
| ARSJ     | ENSG0000 | protein_co | 0.548607 | 0        |
| GRIA3    | ENSG0000 | protein_co | 0.548666 | 1.44E-40 |
| PRDM11   | ENSG0000 | protein_co | 0.549061 | 0        |
| BPI      | ENSG0000 | protein_co | 0.549082 | 1.23E-40 |
| PHF19    | ENSG0000 | protein_co | 0.549264 | 0        |
| PENK     | ENSG0000 | protein_co | 0.549293 | 1.13E-40 |
| FOXN3    | ENSG0000 | protein_co | 0.549426 | 0        |
| TAGLN    | ENSG0000 | protein_co | 0.549489 | 0        |
| SPART    | ENSG0000 | protein_co | 0.549527 | 0        |
| LIX1L    | ENSG0000 | protein_co | 0.549689 | 0        |
| KLHL42   | ENSG0000 | protein_co | 0.549701 | 0        |
| PAM      | ENSG0000 | protein_co | 0.549902 | 0        |
| KCNN3    | ENSG0000 | protein_co | 0.549951 | 0        |
| CNTFR    | ENSG0000 | protein_co | 0.55049  | 0        |
| ADAMTSL2 | ENSG0000 | protein_co | 0.550627 | 0        |
| TLR3     | ENSG0000 | protein_co | 0.550697 | 0        |
| REERG    | ENSG0000 | protein_co | 0.550721 | 0        |
| GLI1     | ENSG0000 | protein_co | 0.550751 | 0        |
| NRG1     | ENSG0000 | protein_co | 0.550949 | 0        |
| SORCS1   | ENSG0000 | protein_co | 0.551093 | 0        |
| EDA2R    | ENSG0000 | protein_co | 0.551095 | 0        |
| MMP14    | ENSG0000 | protein_co | 0.551231 | 0        |
| JAKMIP2  | ENSG0000 | protein_co | 0.551429 | 0        |
| GPX8     | ENSG0000 | protein_co | 0.551574 | 0        |
| CX3CL1   | ENSG0000 | protein_co | 0.551584 | 0        |
| IFI16    | ENSG0000 | protein_co | 0.551635 | 0        |
| ECM1     | ENSG0000 | protein_co | 0.551696 | 0        |
| CD248    | ENSG0000 | protein_co | 0.551907 | 0        |
| KCNIP1   | ENSG0000 | protein_co | 0.552001 | 0        |
| ILDR2    | ENSG0000 | protein_co | 0.552106 | 0        |
| PCOLCE2  | ENSG0000 | protein_co | 0.552455 | 0        |
| CKM      | ENSG0000 | protein_co | 0.552593 | 3.07E-41 |
| MYOM1    | ENSG0000 | protein_co | 0.552756 | 0        |
| RASD2    | ENSG0000 | protein_co | 0.553098 | 0        |
| HR       | ENSG0000 | protein_co | 0.553248 | 0        |
| LEPROT   | ENSG0000 | protein_co | 0.553345 | 0        |
| NAALADL1 | ENSG0000 | protein_co | 0.553352 | 0        |
| BNIP2    | ENSG0000 | protein_co | 0.553586 | 0        |
| RGMA     | ENSG0000 | protein_co | 0.553739 | 0        |
| INPP5D   | ENSG0000 | protein_co | 0.553867 | 0        |
| B3GNT9   | ENSG0000 | protein_co | 0.554006 | 0        |
| COL21A1  | ENSG0000 | protein_co | 0.554076 | 0        |
| MGARP    | ENSG0000 | protein_co | 0.554472 | 0        |
| DNM3     | ENSG0000 | protein_co | 0.554529 | 0        |
| A2M      | ENSG0000 | protein_co | 0.554558 | 0        |
| ADGRL2   | ENSG0000 | protein_co | 0.555147 | 0        |
| RGS13    | ENSG0000 | protein_co | 0.555247 | 1.06E-41 |
| OMD      | ENSG0000 | protein_co | 0.555327 | 0        |
| PRELID2  | ENSG0000 | protein_co | 0.555359 | 0        |
| BACH2    | ENSG0000 | protein_co | 0.555361 | 0        |
| MARVELD1 | ENSG0000 | protein_co | 0.555376 | 0        |
| EDNRB    | ENSG0000 | protein_co | 0.555648 | 0        |
| SHE      | ENSG0000 | protein_co | 0.555988 | 0        |
| CYP11A1  | ENSG0000 | protein_co | 0.556041 | 7.74E-42 |
| RAB38    | ENSG0000 | protein_co | 0.55614  | 0        |
| SYT10    | ENSG0000 | protein_co | 0.556321 | 6.91E-42 |

|           |          |            |          |          |
|-----------|----------|------------|----------|----------|
| KITLG     | ENSG0000 | protein_co | 0.55641  | 0        |
| TNC       | ENSG0000 | protein_co | 0.55707  | 0        |
| ITGA7     | ENSG0000 | protein_co | 0.557541 | 0        |
| SLIT2     | ENSG0000 | protein_co | 0.557837 | 0        |
| PHLDB1    | ENSG0000 | protein_co | 0.557855 | 0        |
| UBE2QL1   | ENSG0000 | protein_co | 0.557928 | 0        |
| EFEMP2    | ENSG0000 | protein_co | 0.558069 | 0        |
| LINGO2    | ENSG0000 | protein_co | 0.558211 | 3.22E-42 |
| ABCB1     | ENSG0000 | protein_co | 0.558264 | 0        |
| JCAD      | ENSG0000 | protein_co | 0.558273 | 0        |
| SEPTIN10  | ENSG0000 | protein_co | 0.558547 | 0        |
| COL6A1    | ENSG0000 | protein_co | 0.558716 | 0        |
| MRAS      | ENSG0000 | protein_co | 0.558743 | 0        |
| FAM124A   | ENSG0000 | protein_co | 0.558881 | 0        |
| SH3BGRL   | ENSG0000 | protein_co | 0.559083 | 0        |
| PTGDS     | ENSG0000 | protein_co | 0.559515 | 0        |
| TINAGL1   | ENSG0000 | protein_co | 0.559529 | 0        |
| LRP4      | ENSG0000 | protein_co | 0.560068 | 0        |
| ANO1      | ENSG0000 | protein_co | 0.560076 | 0        |
| F7        | ENSG0000 | protein_co | 0.560112 | 1.49E-42 |
| GLIS2     | ENSG0000 | protein_co | 0.560405 | 0        |
| NELL1     | ENSG0000 | protein_co | 0.560468 | 1.29E-42 |
| DNAJC18   | ENSG0000 | protein_co | 0.56068  | 0        |
| ARHGEF25  | ENSG0000 | protein_co | 0.561097 | 0        |
| INSYN2A   | ENSG0000 | protein_co | 0.561128 | 9.84E-43 |
| MTMR11    | ENSG0000 | protein_co | 0.561325 | 0        |
| ROR2      | ENSG0000 | protein_co | 0.561383 | 0        |
| MAT2B     | ENSG0000 | protein_co | 0.561582 | 0        |
| AKAP6     | ENSG0000 | protein_co | 0.562007 | 0        |
| INSYN2B   | ENSG0000 | protein_co | 0.56206  | 6.72E-43 |
| CCDC158   | ENSG0000 | protein_co | 0.562192 | 6.37E-43 |
| DACT3     | ENSG0000 | protein_co | 0.56229  | 0        |
| PDE4D     | ENSG0000 | protein_co | 0.562337 | 0        |
| TLR4      | ENSG0000 | protein_co | 0.562567 | 0        |
| LINC00672 | ENSG0000 | protein_co | 0.562685 | 0        |
| CNN1      | ENSG0000 | protein_co | 0.562938 | 0        |
| ADAMTS8   | ENSG0000 | protein_co | 0.563009 | 0        |
| SLC18A2   | ENSG0000 | protein_co | 0.563042 | 4.49E-43 |
| SLC2A4    | ENSG0000 | protein_co | 0.563192 | 0        |
| ADAM33    | ENSG0000 | protein_co | 0.563265 | 0        |
| ZNF711    | ENSG0000 | protein_co | 0.563278 | 0        |
| SLFN12    | ENSG0000 | protein_co | 0.563345 | 0        |
| SLCO3A1   | ENSG0000 | protein_co | 0.563359 | 0        |
| POPDC2    | ENSG0000 | protein_co | 0.563779 | 0        |
| SNAI2     | ENSG0000 | protein_co | 0.563848 | 0        |
| ECRG4     | ENSG0000 | protein_co | 0.563852 | 0        |
| INPP5F    | ENSG0000 | protein_co | 0.563979 | 0        |
| MTMR8     | ENSG0000 | protein_co | 0.564121 | 2.88E-43 |
| AMOTL2    | ENSG0000 | protein_co | 0.564826 | 0        |
| MYH6      | ENSG0000 | protein_co | 0.564889 | 2.09E-43 |
| PGAP1     | ENSG0000 | protein_co | 0.564961 | 0        |
| FRRS1L    | ENSG0000 | protein_co | 0.565017 | 0        |
| CNTNAP1   | ENSG0000 | protein_co | 0.565077 | 0        |
| CD300LG   | ENSG0000 | protein_co | 0.565217 | 1.83E-43 |
| RBMS1     | ENSG0000 | protein_co | 0.565264 | 0        |
| SERPINB9  | ENSG0000 | protein_co | 0.565624 | 0        |
| SAMD4A    | ENSG0000 | protein_co | 0.565907 | 0        |
| SERPINA5  | ENSG0000 | protein_co | 0.565997 | 0        |



|          |          |            |          |          |
|----------|----------|------------|----------|----------|
| GSN      | ENSG0000 | protein_co | 0.566125 | 0        |
| PDCD1LG2 | ENSG0000 | protein_co | 0.566131 | 0        |
| FAM9B    | ENSG0000 | protein_co | 0.566263 | 1.18E-43 |
| RCBTB2   | ENSG0000 | protein_co | 0.566395 | 0        |
| UST      | ENSG0000 | protein_co | 0.566512 | 0        |
| EPB41L3  | ENSG0000 | protein_co | 0.567063 | 0        |
| STK32B   | ENSG0000 | protein_co | 0.567178 | 0        |
| SEC14L6  | ENSG0000 | protein_co | 0.567327 | 7.6E-44  |
| RAB31    | ENSG0000 | protein_co | 0.567447 | 0        |
| FOXC1    | ENSG0000 | protein_co | 0.567955 | 0        |
| CLU      | ENSG0000 | protein_co | 0.568691 | 0        |
| ZNF660   | ENSG0000 | protein_co | 0.56927  | 0        |
| KCNH2    | ENSG0000 | protein_co | 0.569567 | 0        |
| ZNF483   | ENSG0000 | protein_co | 0.569668 | 0        |
| SLC38A5  | ENSG0000 | protein_co | 0.569973 | 0        |
| STX7     | ENSG0000 | protein_co | 0.570311 | 0        |
| NHSL2    | ENSG0000 | protein_co | 0.571478 | 0        |
| FILIP1   | ENSG0000 | protein_co | 0.571711 | 0        |
| CEP120   | ENSG0000 | protein_co | 0.571715 | 0        |
| KCNE5    | ENSG0000 | protein_co | 0.571783 | 1.17E-44 |
| PNMA1    | ENSG0000 | protein_co | 0.571799 | 0        |
| ROR1     | ENSG0000 | protein_co | 0.572044 | 0        |
| PPP1R3C  | ENSG0000 | protein_co | 0.572174 | 0        |
| SH3PXD2A | ENSG0000 | protein_co | 0.572285 | 0        |
| HAAO     | ENSG0000 | protein_co | 0.572579 | 0        |
| CAPN6    | ENSG0000 | protein_co | 0.572783 | 7.62E-45 |
| CACNA1C  | ENSG0000 | protein_co | 0.573022 | 0        |
| STARD9   | ENSG0000 | protein_co | 0.573192 | 0        |
| PAPLN    | ENSG0000 | protein_co | 0.573361 | 0        |
| ACTG2    | ENSG0000 | protein_co | 0.573584 | 0        |
| MAPRE2   | ENSG0000 | protein_co | 0.573619 | 0        |
| TRIM6    | ENSG0000 | protein_co | 0.573849 | 0        |
| PLEKHH2  | ENSG0000 | protein_co | 0.574015 | 0        |
| SPEG     | ENSG0000 | protein_co | 0.574244 | 0        |
| TOR1AIP1 | ENSG0000 | protein_co | 0.574316 | 0        |
| ABI3BP   | ENSG0000 | protein_co | 0.574641 | 0        |
| FAM184A  | ENSG0000 | protein_co | 0.574716 | 0        |
| ACP7     | ENSG0000 | protein_co | 0.574786 | 3.24E-45 |
| JAK1     | ENSG0000 | protein_co | 0.575036 | 0        |
| C12orf75 | ENSG0000 | protein_co | 0.575392 | 0        |
| TMOD1    | ENSG0000 | protein_co | 0.575637 | 0        |
| TRPM3    | ENSG0000 | protein_co | 0.57587  | 2.04E-45 |
| NKD1     | ENSG0000 | protein_co | 0.575923 | 0        |
| KIAA1755 | ENSG0000 | protein_co | 0.575945 | 0        |
| STUM     | ENSG0000 | protein_co | 0.576872 | 0        |
| PTCHD1   | ENSG0000 | protein_co | 0.577302 | 1.1E-45  |
| PLAG1    | ENSG0000 | protein_co | 0.577342 | 0        |
| PDE2A    | ENSG0000 | protein_co | 0.577494 | 0        |
| DBNDD2   | ENSG0000 | protein_co | 0.577854 | 0        |
| PCDHGA9  | ENSG0000 | protein_co | 0.57807  | 7.88E-46 |
| PCARE    | ENSG0000 | protein_co | 0.578138 | 7.65E-46 |
| GAS7     | ENSG0000 | protein_co | 0.579196 | 0        |
| LURAP1   | ENSG0000 | protein_co | 0.579239 | 0        |
| PROK1    | ENSG0000 | protein_co | 0.579289 | 4.64E-46 |
| ARL10    | ENSG0000 | protein_co | 0.57944  | 0        |
| HMCN1    | ENSG0000 | protein_co | 0.579459 | 0        |
| EFNA5    | ENSG0000 | protein_co | 0.579535 | 0        |
| PABPC4L  | ENSG0000 | protein_co | 0.579586 | 0        |

|           |          |            |          |          |
|-----------|----------|------------|----------|----------|
| RAB11FIP2 | ENSG0000 | protein_co | 0.580063 | 0        |
| RTL5      | ENSG0000 | protein_co | 0.580251 | 0        |
| MAP1B     | ENSG0000 | protein_co | 0.58059  | 0        |
| PLA2G4A   | ENSG0000 | protein_co | 0.581156 | 0        |
| NRP2      | ENSG0000 | protein_co | 0.581294 | 0        |
| SEMA6D    | ENSG0000 | protein_co | 0.581846 | 0        |
| PURG      | ENSG0000 | protein_co | 0.581961 | 1.44E-46 |
| PIK3R1    | ENSG0000 | protein_co | 0.582081 | 0        |
| MS4A2     | ENSG0000 | protein_co | 0.582347 | 0        |
| DPT       | ENSG0000 | protein_co | 0.582355 | 0        |
| FBLN5     | ENSG0000 | protein_co | 0.582464 | 0        |
| GNG12     | ENSG0000 | protein_co | 0.582473 | 0        |
| LDB2      | ENSG0000 | protein_co | 0.582483 | 0        |
| ST8SIA1   | ENSG0000 | protein_co | 0.583142 | 0        |
| KANK1     | ENSG0000 | protein_co | 0.583154 | 0        |
| TRIM61    | ENSG0000 | protein_co | 0.58338  | 7.73E-47 |
| MFAP4     | ENSG0000 | protein_co | 0.583968 | 0        |
| DST       | ENSG0000 | protein_co | 0.584039 | 0        |
| HVCN1     | ENSG0000 | protein_co | 0.584043 | 0        |
| OLFML3    | ENSG0000 | protein_co | 0.584123 | 0        |
| HECW1     | ENSG0000 | protein_co | 0.584201 | 0        |
| TNFAIP8L3 | ENSG0000 | protein_co | 0.584248 | 0        |
| XKR5      | ENSG0000 | protein_co | 0.584389 | 4.95E-47 |
| ABCA6     | ENSG0000 | protein_co | 0.584693 | 0        |
| ARHGEF40  | ENSG0000 | protein_co | 0.584802 | 0        |
| ARHGEF6   | ENSG0000 | protein_co | 0.584964 | 0        |
| MDFIC     | ENSG0000 | protein_co | 0.585152 | 0        |
| TRO       | ENSG0000 | protein_co | 0.585158 | 0        |
| CDK15     | ENSG0000 | protein_co | 0.58526  | 0        |
| TBX4      | ENSG0000 | protein_co | 0.586066 | 2.35E-47 |
| NTRK2     | ENSG0000 | protein_co | 0.586822 | 0        |
| EID3      | ENSG0000 | protein_co | 0.587032 | 0        |
| FBXO30    | ENSG0000 | protein_co | 0.587251 | 0        |
| FNBP1     | ENSG0000 | protein_co | 0.587332 | 0        |
| EPHB1     | ENSG0000 | protein_co | 0.587454 | 0        |
| SEMA5A    | ENSG0000 | protein_co | 0.587889 | 0        |
| TCEAL5    | ENSG0000 | protein_co | 0.588074 | 9.58E-48 |
| LUM       | ENSG0000 | protein_co | 0.588421 | 0        |
| TGFB111   | ENSG0000 | protein_co | 0.588468 | 0        |
| CEP68     | ENSG0000 | protein_co | 0.588646 | 0        |
| KCNA2     | ENSG0000 | protein_co | 0.588801 | 6.91E-48 |
| PAGE4     | ENSG0000 | protein_co | 0.588844 | 6.78E-48 |
| CRIM1     | ENSG0000 | protein_co | 0.588913 | 0        |
| TENM2     | ENSG0000 | protein_co | 0.589276 | 0        |
| RGS9      | ENSG0000 | protein_co | 0.589654 | 0        |
| NEURL1B   | ENSG0000 | protein_co | 0.589867 | 0        |
| HGF       | ENSG0000 | protein_co | 0.589925 | 0        |
| KCTD9     | ENSG0000 | protein_co | 0.589971 | 0        |
| FOXF2     | ENSG0000 | protein_co | 0.590547 | 0        |
| ZBTB47    | ENSG0000 | protein_co | 0.590594 | 0        |
| NMUR1     | ENSG0000 | protein_co | 0.590712 | 0        |
| RPRM      | ENSG0000 | protein_co | 0.590747 | 0        |
| GPM6A     | ENSG0000 | protein_co | 0.590877 | 0        |
| AFAP1L2   | ENSG0000 | protein_co | 0.590891 | 0        |
| ANKRD35   | ENSG0000 | protein_co | 0.590985 | 0        |
| NES       | ENSG0000 | protein_co | 0.591056 | 0        |
| RSPO2     | ENSG0000 | protein_co | 0.591307 | 0        |
| SYNDIG1   | ENSG0000 | protein_co | 0.591318 | 0        |

|          |          |            |          |          |
|----------|----------|------------|----------|----------|
| WSCD2    | ENSG0000 | protein_co | 0.591408 | 0        |
| GRIK5    | ENSG0000 | protein_co | 0.59165  | 0        |
| DRP2     | ENSG0000 | protein_co | 0.591987 | 0        |
| ADCY3    | ENSG0000 | protein_co | 0.59243  | 0        |
| PREX2    | ENSG0000 | protein_co | 0.592459 | 0        |
| YAP1     | ENSG0000 | protein_co | 0.592536 | 0        |
| MEF2A    | ENSG0000 | protein_co | 0.592843 | 0        |
| MYL3     | ENSG0000 | protein_co | 0.592936 | 1.06E-48 |
| AMPH     | ENSG0000 | protein_co | 0.59316  | 0        |
| TCEAL2   | ENSG0000 | protein_co | 0.593161 | 9.59E-49 |
| CTF1     | ENSG0000 | protein_co | 0.593194 | 0        |
| LAYN     | ENSG0000 | protein_co | 0.593229 | 0        |
| FST      | ENSG0000 | protein_co | 0.593245 | 0        |
| CERK     | ENSG0000 | protein_co | 0.593379 | 0        |
| SPRED1   | ENSG0000 | protein_co | 0.593541 | 0        |
| CSRP1    | ENSG0000 | protein_co | 0.59371  | 0        |
| ADGRB3   | ENSG0000 | protein_co | 0.593944 | 6.7E-49  |
| MYOF     | ENSG0000 | protein_co | 0.593976 | 0        |
| CEP126   | ENSG0000 | protein_co | 0.594029 | 0        |
| RMDN2    | ENSG0000 | protein_co | 0.594163 | 0        |
| AGPAT4   | ENSG0000 | protein_co | 0.59417  | 0        |
| C1QTNF1  | ENSG0000 | protein_co | 0.5943   | 0        |
| RNF180   | ENSG0000 | protein_co | 0.594353 | 0        |
| KCNJ3    | ENSG0000 | protein_co | 0.594363 | 0        |
| NAALAD2  | ENSG0000 | protein_co | 0.594515 | 0        |
| SERPING1 | ENSG0000 | protein_co | 0.594615 | 0        |
| KRT222   | ENSG0000 | protein_co | 0.594662 | 4.83E-49 |
| ATCAY    | ENSG0000 | protein_co | 0.594692 | 0        |
| HFE      | ENSG0000 | protein_co | 0.594738 | 0        |
| MBNL1    | ENSG0000 | protein_co | 0.594967 | 0        |
| DGKG     | ENSG0000 | protein_co | 0.595206 | 0        |
| PNMA8B   | ENSG0000 | protein_co | 0.595305 | 0        |
| KSR1     | ENSG0000 | protein_co | 0.595514 | 0        |
| APOB     | ENSG0000 | protein_co | 0.595851 | 2.79E-49 |
| MEF2C    | ENSG0000 | protein_co | 0.596014 | 0        |
| INMT     | ENSG0000 | protein_co | 0.596272 | 0        |
| LAMA4    | ENSG0000 | protein_co | 0.596287 | 0        |
| RECK     | ENSG0000 | protein_co | 0.596791 | 0        |
| SCHIP1   | ENSG0000 | protein_co | 0.596869 | 1.75E-49 |
| MSN      | ENSG0000 | protein_co | 0.59691  | 0        |
| L3MBTL4  | ENSG0000 | protein_co | 0.596925 | 0        |
| TMEM200  | ENSG0000 | protein_co | 0.596992 | 1.65E-49 |
| HS3ST3B1 | ENSG0000 | protein_co | 0.597267 | 0        |
| NAP1L3   | ENSG0000 | protein_co | 0.597669 | 0        |
| MB21D2   | ENSG0000 | protein_co | 0.598135 | 0        |
| AFF2     | ENSG0000 | protein_co | 0.59825  | 9.2E-50  |
| WIPF3    | ENSG0000 | protein_co | 0.598361 | 0        |
| EDN3     | ENSG0000 | protein_co | 0.598377 | 8.67E-50 |
| LRRC34   | ENSG0000 | protein_co | 0.598519 | 0        |
| NAV2     | ENSG0000 | protein_co | 0.598653 | 0        |
| ID4      | ENSG0000 | protein_co | 0.598858 | 0        |
| RHBDL3   | ENSG0000 | protein_co | 0.599112 | 0        |
| SRL      | ENSG0000 | protein_co | 0.599114 | 0        |
| WFDC1    | ENSG0000 | protein_co | 0.599625 | 0        |
| ACACB    | ENSG0000 | protein_co | 0.599687 | 0        |
| JAM2     | ENSG0000 | protein_co | 0.599708 | 0        |
| MRC2     | ENSG0000 | protein_co | 0.599841 | 0        |
| SLC1A7   | ENSG0000 | protein_co | 0.59995  | 0        |

|          |          |            |          |          |
|----------|----------|------------|----------|----------|
| HECTD2   | ENSG0000 | protein_co | 0.600007 | 0        |
| PLAAT5   | ENSG0000 | protein_co | 0.600648 | 3.01E-50 |
| CDKL1    | ENSG0000 | protein_co | 0.601206 | 0        |
| KIAA0408 | ENSG0000 | protein_co | 0.60157  | 1.95E-50 |
| ABCD2    | ENSG0000 | protein_co | 0.601644 | 1.88E-50 |
| DCBLD2   | ENSG0000 | protein_co | 0.601792 | 0        |
| ZNF185   | ENSG0000 | protein_co | 0.602351 | 0        |
| RUSC2    | ENSG0000 | protein_co | 0.602477 | 0        |
| POGLUT3  | ENSG0000 | protein_co | 0.602523 | 0        |
| RNF175   | ENSG0000 | protein_co | 0.602552 | 1.23E-50 |
| PDPN     | ENSG0000 | protein_co | 0.602877 | 0        |
| PLBD1    | ENSG0000 | protein_co | 0.602904 | 0        |
| SMOC1    | ENSG0000 | protein_co | 0.603223 | 0        |
| C15orf41 | ENSG0000 | protein_co | 0.603846 | 0        |
| SETBP1   | ENSG0000 | protein_co | 0.603996 | 0        |
| PLXDC2   | ENSG0000 | protein_co | 0.604583 | 0        |
| NYAP1    | ENSG0000 | protein_co | 0.604663 | 0        |
| EPHA7    | ENSG0000 | protein_co | 0.604847 | 0        |
| SMAD3    | ENSG0000 | protein_co | 0.604937 | 0        |
| FAM162B  | ENSG0000 | protein_co | 0.605015 | 0        |
| RHOJ     | ENSG0000 | protein_co | 0.605031 | 0        |
| PCYT1B   | ENSG0000 | protein_co | 0.605396 | 3.19E-51 |
| SLC12A4  | ENSG0000 | protein_co | 0.605798 | 0        |
| CRISPLD2 | ENSG0000 | protein_co | 0.606118 | 0        |
| LMO4     | ENSG0000 | protein_co | 0.606168 | 0        |
| CACNA2D  | ENSG0000 | protein_co | 0.606638 | 0        |
| ADAM19   | ENSG0000 | protein_co | 0.606741 | 0        |
| TMEM106  | ENSG0000 | protein_co | 0.606756 | 0        |
| KATNAL1  | ENSG0000 | protein_co | 0.607163 | 0        |
| SLC35F4  | ENSG0000 | protein_co | 0.607179 | 1.36E-51 |
| ADAMTSL  | ENSG0000 | protein_co | 0.607651 | 0        |
| CYTL1    | ENSG0000 | protein_co | 0.607705 | 0        |
| FEZ1     | ENSG0000 | protein_co | 0.607845 | 0        |
| ADRA1D   | ENSG0000 | protein_co | 0.608158 | 8.49E-52 |
| PRPH2    | ENSG0000 | protein_co | 0.608506 | 0        |
| KLHL5    | ENSG0000 | protein_co | 0.608852 | 0        |
| QPRT     | ENSG0000 | protein_co | 0.608937 | 0        |
| AL096711 | ENSG0000 | protein_co | 0.609609 | 4.21E-52 |
| NFASC    | ENSG0000 | protein_co | 0.610324 | 0        |
| BDNF     | ENSG0000 | protein_co | 0.610445 | 0        |
| PMP22    | ENSG0000 | protein_co | 0.610727 | 0        |
| TIMP3    | ENSG0000 | protein_co | 0.610791 | 2.38E-52 |
| CSMD3    | ENSG0000 | protein_co | 0.610809 | 2.36E-52 |
| F10      | ENSG0000 | protein_co | 0.610839 | 0        |
| PAMR1    | ENSG0000 | protein_co | 0.610948 | 0        |
| MRGPRE   | ENSG0000 | protein_co | 0.611799 | 1.45E-52 |
| HSPB7    | ENSG0000 | protein_co | 0.612122 | 0        |
| PRDM5    | ENSG0000 | protein_co | 0.612154 | 0        |
| INMT-MIN | ENSG0000 | protein_co | 0.612234 | 1.18E-52 |
| NTRK3    | ENSG0000 | protein_co | 0.612619 | 0        |
| TMTC1    | ENSG0000 | protein_co | 0.612877 | 0        |
| DNAJB5   | ENSG0000 | protein_co | 0.613077 | 0        |
| TACC1    | ENSG0000 | protein_co | 0.613287 | 0        |
| SAMD14   | ENSG0000 | protein_co | 0.613559 | 0        |
| TSPAN11  | ENSG0000 | protein_co | 0.613718 | 0        |
| TCEAL7   | ENSG0000 | protein_co | 0.613783 | 0        |
| ACOX2    | ENSG0000 | protein_co | 0.614357 | 0        |
| FBN1     | ENSG0000 | protein_co | 0.614583 | 0        |

|          |          |            |          |          |
|----------|----------|------------|----------|----------|
| DENND2A  | ENSG0000 | protein_co | 0.615184 | 0        |
| DMC1     | ENSG0000 | protein_co | 0.615547 | 0        |
| LCA5     | ENSG0000 | protein_co | 0.615687 | 0        |
| PLPP7    | ENSG0000 | protein_co | 0.615703 | 0        |
| WNT16    | ENSG0000 | protein_co | 0.615819 | 2.02E-53 |
| CORO1C   | ENSG0000 | protein_co | 0.615971 | 0        |
| TRIM9    | ENSG0000 | protein_co | 0.616936 | 1.16E-53 |
| NKAPL    | ENSG0000 | protein_co | 0.616957 | 1.15E-53 |
| SNAP25   | ENSG0000 | protein_co | 0.617317 | 9.61E-54 |
| MRGPRF   | ENSG0000 | protein_co | 0.617459 | 0        |
| FCHSD2   | ENSG0000 | protein_co | 0.618077 | 0        |
| MMP2     | ENSG0000 | protein_co | 0.618417 | 0        |
| IP6K3    | ENSG0000 | protein_co | 0.618464 | 5.43E-54 |
| WIPF1    | ENSG0000 | protein_co | 0.618557 | 0        |
| GXYLT2   | ENSG0000 | protein_co | 0.618605 | 0        |
| BEND6    | ENSG0000 | protein_co | 0.618685 | 0        |
| KCNS2    | ENSG0000 | protein_co | 0.618733 | 4.74E-54 |
| ETV5     | ENSG0000 | protein_co | 0.619185 | 0        |
| ELMOD1   | ENSG0000 | protein_co | 0.619524 | 3.19E-54 |
| MAML2    | ENSG0000 | protein_co | 0.6196   | 0        |
| CYS1     | ENSG0000 | protein_co | 0.619957 | 0        |
| GNAZ     | ENSG0000 | protein_co | 0.620457 | 0        |
| JPH2     | ENSG0000 | protein_co | 0.620587 | 0        |
| SBSPON   | ENSG0000 | protein_co | 0.62061  | 0        |
| P2RX2    | ENSG0000 | protein_co | 0.620619 | 0        |
| ARHGAP23 | ENSG0000 | protein_co | 0.620682 | 0        |
| STOM     | ENSG0000 | protein_co | 0.620864 | 0        |
| MXRA5    | ENSG0000 | protein_co | 0.62113  | 0        |
| IL6ST    | ENSG0000 | protein_co | 0.621366 | 0        |
| HSPB6    | ENSG0000 | protein_co | 0.621557 | 0        |
| PLEKHA2  | ENSG0000 | protein_co | 0.621753 | 0        |
| KCNB1    | ENSG0000 | protein_co | 0.621988 | 0        |
| NRG2     | ENSG0000 | protein_co | 0.6222   | 0        |
| PDE7B    | ENSG0000 | protein_co | 0.622364 | 0        |
| APOBEC3C | ENSG0000 | protein_co | 0.622883 | 0        |
| MCC      | ENSG0000 | protein_co | 0.622934 | 0        |
| PDE1C    | ENSG0000 | protein_co | 0.623479 | 4.33E-55 |
| TGFB2    | ENSG0000 | protein_co | 0.623515 | 0        |
| DPYD     | ENSG0000 | protein_co | 0.623516 | 0        |
| ARHGAP11 | ENSG0000 | protein_co | 0.623632 | 0        |
| ABCA8    | ENSG0000 | protein_co | 0.623842 | 0        |
| LRRC2    | ENSG0000 | protein_co | 0.623928 | 0        |
| DRD1     | ENSG0000 | protein_co | 0.624017 | 3.3E-55  |
| PYGM     | ENSG0000 | protein_co | 0.624448 | 0        |
| CAVIN1   | ENSG0000 | protein_co | 0.624519 | 0        |
| ZNF154   | ENSG0000 | protein_co | 0.624729 | 0        |
| KCNQ5    | ENSG0000 | protein_co | 0.624881 | 0        |
| NR2F1    | ENSG0000 | protein_co | 0.626132 | 0        |
| CFH      | ENSG0000 | protein_co | 0.626189 | 0        |
| SYNPO    | ENSG0000 | protein_co | 0.626689 | 0        |
| SYNC     | ENSG0000 | protein_co | 0.626945 | 0        |
| EMILIN1  | ENSG0000 | protein_co | 0.627073 | 0        |
| TCF7L1   | ENSG0000 | protein_co | 0.627251 | 0        |
| TMEM47   | ENSG0000 | protein_co | 0.627507 | 0        |
| RARB     | ENSG0000 | protein_co | 0.627779 | 0        |
| STOX2    | ENSG0000 | protein_co | 0.628073 | 0        |
| RBFOX3   | ENSG0000 | protein_co | 0.628437 | 0        |
| PRICKLE1 | ENSG0000 | protein_co | 0.629072 | 0        |

|           |          |            |          |          |
|-----------|----------|------------|----------|----------|
| TCF4      | ENSG0000 | protein_co | 0.629137 | 0        |
| NID2      | ENSG0000 | protein_co | 0.629204 | 0        |
| CRTAP     | ENSG0000 | protein_co | 0.629338 | 0        |
| RBPM5     | ENSG0000 | protein_co | 0.629419 | 0        |
| SYDE1     | ENSG0000 | protein_co | 0.629442 | 0        |
| TBL1X     | ENSG0000 | protein_co | 0.629538 | 0        |
| HOXD12    | ENSG0000 | protein_co | 0.629785 | 1.69E-56 |
| EVC2      | ENSG0000 | protein_co | 0.63028  | 0        |
| EMILIN3   | ENSG0000 | protein_co | 0.630415 | 0        |
| RSPO1     | ENSG0000 | protein_co | 0.630558 | 1.13E-56 |
| ITSN1     | ENSG0000 | protein_co | 0.630754 | 0        |
| ANK2      | ENSG0000 | protein_co | 0.63086  | 0        |
| CCBE1     | ENSG0000 | protein_co | 0.63134  | 0        |
| PBX1      | ENSG0000 | protein_co | 0.631533 | 0        |
| MOB3B     | ENSG0000 | protein_co | 0.632018 | 0        |
| STAT5B    | ENSG0000 | protein_co | 0.632069 | 0        |
| AXL       | ENSG0000 | protein_co | 0.632343 | 0        |
| TVP23A    | ENSG0000 | protein_co | 0.632399 | 0        |
| GRK5      | ENSG0000 | protein_co | 0.632773 | 0        |
| LAMA2     | ENSG0000 | protein_co | 0.632868 | 0        |
| CPEB1     | ENSG0000 | protein_co | 0.633431 | 0        |
| MAN1A1    | ENSG0000 | protein_co | 0.633616 | 0        |
| ADCYAP1F  | ENSG0000 | protein_co | 0.634035 | 1.82E-57 |
| C20orf194 | ENSG0000 | protein_co | 0.634095 | 0        |
| GPRC5B    | ENSG0000 | protein_co | 0.634131 | 0        |
| FOXO1     | ENSG0000 | protein_co | 0.634367 | 0        |
| ACTA2     | ENSG0000 | protein_co | 0.634582 | 0        |
| CBX7      | ENSG0000 | protein_co | 0.634762 | 0        |
| CCDC85A   | ENSG0000 | protein_co | 0.634926 | 1.14E-57 |
| LHFPL2    | ENSG0000 | protein_co | 0.635016 | 0        |
| FAM107A   | ENSG0000 | protein_co | 0.635414 | 0        |
| NYNRIN    | ENSG0000 | protein_co | 0.636031 | 0        |
| EPB41L2   | ENSG0000 | protein_co | 0.636043 | 0        |
| WWTR1     | ENSG0000 | protein_co | 0.636509 | 0        |
| SYNE1     | ENSG0000 | protein_co | 0.636662 | 0        |
| PRKCA     | ENSG0000 | protein_co | 0.636858 | 0        |
| DMD       | ENSG0000 | protein_co | 0.636909 | 0        |
| GLI3      | ENSG0000 | protein_co | 0.637051 | 0        |
| KLF8      | ENSG0000 | protein_co | 0.637205 | 0        |
| ITGA8     | ENSG0000 | protein_co | 0.637246 | 0        |
| ILK       | ENSG0000 | protein_co | 0.637568 | 0        |
| PLCL2     | ENSG0000 | protein_co | 0.637635 | 0        |
| SOX5      | ENSG0000 | protein_co | 0.637828 | 0        |
| ABCG2     | ENSG0000 | protein_co | 0.638374 | 0        |
| ANXA6     | ENSG0000 | protein_co | 0.63845  | 0        |
| SCN5A     | ENSG0000 | protein_co | 0.639285 | 0        |
| BMERB1    | ENSG0000 | protein_co | 0.639818 | 0        |
| DUSP19    | ENSG0000 | protein_co | 0.639911 | 0        |
| GJC1      | ENSG0000 | protein_co | 0.640045 | 0        |
| DPYSL2    | ENSG0000 | protein_co | 0.6405   | 0        |
| FILIP1L   | ENSG0000 | protein_co | 0.6405   | 0        |
| ALDH1A2   | ENSG0000 | protein_co | 0.640576 | 0        |
| MR1       | ENSG0000 | protein_co | 0.640719 | 0        |
| PPARGC1A  | ENSG0000 | protein_co | 0.640736 | 0        |
| RND2      | ENSG0000 | protein_co | 0.641047 | 0        |
| LONRF3    | ENSG0000 | protein_co | 0.641235 | 0        |
| PRELP     | ENSG0000 | protein_co | 0.641423 | 0        |
| TEAD1     | ENSG0000 | protein_co | 0.641764 | 0        |

|         |          |            |          |          |
|---------|----------|------------|----------|----------|
| ZNF728  | ENSG0000 | protein_co | 0.642138 | 2.36E-59 |
| DCHS2   | ENSG0000 | protein_co | 0.642255 | 2.21E-59 |
| LARGE1  | ENSG0000 | protein_co | 0.642325 | 0        |
| FBXO17  | ENSG0000 | protein_co | 0.642343 | 0        |
| C1S     | ENSG0000 | protein_co | 0.642958 | 0        |
| HIF3A   | ENSG0000 | protein_co | 0.642976 | 0        |
| TWIST2  | ENSG0000 | protein_co | 0.643027 | 0        |
| DACT1   | ENSG0000 | protein_co | 0.643072 | 0        |
| EHD2    | ENSG0000 | protein_co | 0.643185 | 0        |
| IGSF1   | ENSG0000 | protein_co | 0.643733 | 9.86E-60 |
| LSM11   | ENSG0000 | protein_co | 0.643897 | 0        |
| SLC16A7 | ENSG0000 | protein_co | 0.644047 | 0        |
| GFPT2   | ENSG0000 | protein_co | 0.64407  | 0        |
| PAPPA   | ENSG0000 | protein_co | 0.644491 | 0        |
| CCDC80  | ENSG0000 | protein_co | 0.64472  | 0        |
| ATP1B2  | ENSG0000 | protein_co | 0.644919 | 0        |
| DENND2B | ENSG0000 | protein_co | 0.645951 | 0        |
| RCAN2   | ENSG0000 | protein_co | 0.646315 | 0        |
| NID1    | ENSG0000 | protein_co | 0.647036 | 0        |
| SGCG    | ENSG0000 | protein_co | 0.647213 | 1.45E-60 |
| SHISAL1 | ENSG0000 | protein_co | 0.647246 | 0        |
| CCDC69  | ENSG0000 | protein_co | 0.647417 | 0        |
| SYNM    | ENSG0000 | protein_co | 0.647652 | 0        |
| RND3    | ENSG0000 | protein_co | 0.64777  | 0        |
| LGR6    | ENSG0000 | protein_co | 0.648254 | 0        |
| KIT     | ENSG0000 | protein_co | 0.648276 | 0        |
| GJA1    | ENSG0000 | protein_co | 0.64829  | 0        |
| LPP     | ENSG0000 | protein_co | 0.648351 | 0        |
| ECM2    | ENSG0000 | protein_co | 0.648642 | 0        |
| LTBP1   | ENSG0000 | protein_co | 0.648746 | 0        |
| LPAR1   | ENSG0000 | protein_co | 0.648767 | 0        |
| SRPX    | ENSG0000 | protein_co | 0.648845 | 0        |
| DYNC111 | ENSG0000 | protein_co | 0.649656 | 0        |
| TPM1    | ENSG0000 | protein_co | 0.649958 | 0        |
| RUNX1T1 | ENSG0000 | protein_co | 0.650289 | 0        |
| TLN1    | ENSG0000 | protein_co | 0.650685 | 0        |
| DCHS1   | ENSG0000 | protein_co | 0.6514   | 0        |
| CSRNP3  | ENSG0000 | protein_co | 0.651567 | 0        |
| GLIS1   | ENSG0000 | protein_co | 0.651656 | 1.2E-61  |
| RBFOX2  | ENSG0000 | protein_co | 0.652152 | 0        |
| MBNL2   | ENSG0000 | protein_co | 0.652673 | 0        |
| FHOD3   | ENSG0000 | protein_co | 0.652745 | 0        |
| SFRP1   | ENSG0000 | protein_co | 0.652827 | 0        |
| CCDC88A | ENSG0000 | protein_co | 0.652859 | 0        |
| GATM    | ENSG0000 | protein_co | 0.652915 | 0        |
| KCNT2   | ENSG0000 | protein_co | 0.653266 | 4.84E-62 |
| ZNF516  | ENSG0000 | protein_co | 0.65383  | 0        |
| ITGB3   | ENSG0000 | protein_co | 0.654114 | 0        |
| ACTN1   | ENSG0000 | protein_co | 0.654127 | 0        |
| CELF2   | ENSG0000 | protein_co | 0.654199 | 0        |
| MMP16   | ENSG0000 | protein_co | 0.654249 | 0        |
| LRRN3   | ENSG0000 | protein_co | 0.654724 | 2.11E-62 |
| CAVIN2  | ENSG0000 | protein_co | 0.654797 | 0        |
| EPM2A   | ENSG0000 | protein_co | 0.65503  | 0        |
| PLN     | ENSG0000 | protein_co | 0.655092 | 0        |
| TGFBR2  | ENSG0000 | protein_co | 0.655307 | 0        |
| GNAL    | ENSG0000 | protein_co | 0.655607 | 0        |
| BMPER   | ENSG0000 | protein_co | 0.655888 | 0        |

|          |          |            |          |          |
|----------|----------|------------|----------|----------|
| PSIP1    | ENSG0000 | protein_co | 0.657093 | 0        |
| BMP4     | ENSG0000 | protein_co | 0.657343 | 0        |
| SCUBE3   | ENSG0000 | protein_co | 0.657562 | 0        |
| PLCL1    | ENSG0000 | protein_co | 0.657631 | 0        |
| IQSEC3   | ENSG0000 | protein_co | 0.657719 | 0        |
| RIMS3    | ENSG0000 | protein_co | 0.658135 | 0        |
| ZEB1     | ENSG0000 | protein_co | 0.658467 | 0        |
| EGFLAM   | ENSG0000 | protein_co | 0.658599 | 0        |
| LEPR     | ENSG0000 | protein_co | 0.658807 | 0        |
| HSD11B1  | ENSG0000 | protein_co | 0.658833 | 0        |
| KLHL13   | ENSG0000 | protein_co | 0.659302 | 0        |
| PCDH7    | ENSG0000 | protein_co | 0.66016  | 0        |
| ASB2     | ENSG0000 | protein_co | 0.660863 | 0        |
| JPH4     | ENSG0000 | protein_co | 0.662114 | 0        |
| ISL1     | ENSG0000 | protein_co | 0.662588 | 0        |
| AHNAK2   | ENSG0000 | protein_co | 0.662641 | 0        |
| KIRREL1  | ENSG0000 | protein_co | 0.662788 | 0        |
| EDIL3    | ENSG0000 | protein_co | 0.664247 | 0        |
| NPR2     | ENSG0000 | protein_co | 0.664271 | 0        |
| COL6A3   | ENSG0000 | protein_co | 0.664474 | 0        |
| MYOZ3    | ENSG0000 | protein_co | 0.664559 | 0        |
| CNRIP1   | ENSG0000 | protein_co | 0.665375 | 0        |
| CALD1    | ENSG0000 | protein_co | 0.665915 | 0        |
| COL4A4   | ENSG0000 | protein_co | 0.666089 | 0        |
| KLHL33   | ENSG0000 | protein_co | 0.666464 | 2.22E-65 |
| TSPAN2   | ENSG0000 | protein_co | 0.666662 | 0        |
| TTC28    | ENSG0000 | protein_co | 0.666719 | 0        |
| TSHZ3    | ENSG0000 | protein_co | 0.666864 | 0        |
| PPP1R12A | ENSG0000 | protein_co | 0.66715  | 0        |
| SERPINF1 | ENSG0000 | protein_co | 0.667199 | 0        |
| FKBP7    | ENSG0000 | protein_co | 0.668003 | 0        |
| CCND2    | ENSG0000 | protein_co | 0.668041 | 0        |
| RBFOX1   | ENSG0000 | protein_co | 0.66839  | 6.99E-66 |
| GLT8D2   | ENSG0000 | protein_co | 0.668627 | 0        |
| GNG2     | ENSG0000 | protein_co | 0.670178 | 0        |
| TRPC6    | ENSG0000 | protein_co | 0.670282 | 0        |
| RGS7BP   | ENSG0000 | protein_co | 0.671199 | 0        |
| PODN     | ENSG0000 | protein_co | 0.671391 | 0        |
| RGN      | ENSG0000 | protein_co | 0.672028 | 0        |
| CCDC8    | ENSG0000 | protein_co | 0.672327 | 0        |
| MAP1A    | ENSG0000 | protein_co | 0.672369 | 0        |
| CAND2    | ENSG0000 | protein_co | 0.673124 | 0        |
| NCAM1    | ENSG0000 | protein_co | 0.673293 | 0        |
| FAIM2    | ENSG0000 | protein_co | 0.673832 | 0        |
| CORO2B   | ENSG0000 | protein_co | 0.674215 | 0        |
| CES1     | ENSG0000 | protein_co | 0.674232 | 0        |
| CLIC4    | ENSG0000 | protein_co | 0.674647 | 0        |
| NDP      | ENSG0000 | protein_co | 0.675441 | 0        |
| PRRX1    | ENSG0000 | protein_co | 0.675546 | 0        |
| SPRY2    | ENSG0000 | protein_co | 0.676443 | 0        |
| CAMK4    | ENSG0000 | protein_co | 0.676606 | 0        |
| FMN2     | ENSG0000 | protein_co | 0.677284 | 3.01E-68 |
| MXRA7    | ENSG0000 | protein_co | 0.677335 | 0        |
| STARD8   | ENSG0000 | protein_co | 0.677685 | 0        |
| SGCB     | ENSG0000 | protein_co | 0.677908 | 0        |
| CLDN11   | ENSG0000 | protein_co | 0.678119 | 0        |
| PIEZO2   | ENSG0000 | protein_co | 0.678382 | 0        |
| ZNF536   | ENSG0000 | protein_co | 0.678456 | 1.45E-68 |



|          |          |            |          |          |
|----------|----------|------------|----------|----------|
| SLITRK6  | ENSG0000 | protein_co | 0.678594 | 0        |
| PDZRN4   | ENSG0000 | protein_co | 0.678679 | 0        |
| DCN      | ENSG0000 | protein_co | 0.678857 | 0        |
| ARMH4    | ENSG0000 | protein_co | 0.679036 | 0        |
| DIXDC1   | ENSG0000 | protein_co | 0.679201 | 0        |
| NHS      | ENSG0000 | protein_co | 0.679338 | 0        |
| CAMK2G   | ENSG0000 | protein_co | 0.679475 | 0        |
| KCNMB1   | ENSG0000 | protein_co | 0.679559 | 0        |
| MCF2     | ENSG0000 | protein_co | 0.679774 | 6.32E-69 |
| HHIP     | ENSG0000 | protein_co | 0.680128 | 0        |
| DZIP1    | ENSG0000 | protein_co | 0.680406 | 0        |
| SV2A     | ENSG0000 | protein_co | 0.680517 | 0        |
| COL14A1  | ENSG0000 | protein_co | 0.681174 | 0        |
| HSPB8    | ENSG0000 | protein_co | 0.681935 | 0        |
| CAP2     | ENSG0000 | protein_co | 0.682021 | 0        |
| LTBP4    | ENSG0000 | protein_co | 0.682214 | 0        |
| PRDM6    | ENSG0000 | protein_co | 0.682216 | 0        |
| PEAK1    | ENSG0000 | protein_co | 0.68229  | 0        |
| ADGRD1   | ENSG0000 | protein_co | 0.68242  | 0        |
| DNAJB4   | ENSG0000 | protein_co | 0.68314  | 0        |
| SCN4B    | ENSG0000 | protein_co | 0.683434 | 0        |
| PLSCR4   | ENSG0000 | protein_co | 0.683621 | 0        |
| CHST3    | ENSG0000 | protein_co | 0.684082 | 0        |
| PLPP3    | ENSG0000 | protein_co | 0.684669 | 0        |
| RNF112   | ENSG0000 | protein_co | 0.684941 | 0        |
| BOC      | ENSG0000 | protein_co | 0.685521 | 0        |
| PTGS1    | ENSG0000 | protein_co | 0.686386 | 0        |
| ACSL4    | ENSG0000 | protein_co | 0.686571 | 0        |
| LRCH2    | ENSG0000 | protein_co | 0.686595 | 0        |
| HOXD13   | ENSG0000 | protein_co | 0.687025 | 0        |
| CCDC89   | ENSG0000 | protein_co | 0.687549 | 0        |
| AOX1     | ENSG0000 | protein_co | 0.68796  | 0        |
| FHL1     | ENSG0000 | protein_co | 0.688005 | 0        |
| LMO3     | ENSG0000 | protein_co | 0.688706 | 0        |
| IRAK3    | ENSG0000 | protein_co | 0.688947 | 0        |
| RGL1     | ENSG0000 | protein_co | 0.688958 | 0        |
| WFIKKN2  | ENSG0000 | protein_co | 0.689291 | 1.41E-71 |
| C2orf88  | ENSG0000 | protein_co | 0.689424 | 0        |
| FBLN1    | ENSG0000 | protein_co | 0.689537 | 0        |
| SCARA3   | ENSG0000 | protein_co | 0.689579 | 0        |
| EYA1     | ENSG0000 | protein_co | 0.689964 | 0        |
| GPR161   | ENSG0000 | protein_co | 0.690816 | 0        |
| ANO4     | ENSG0000 | protein_co | 0.690819 | 0        |
| CLVS2    | ENSG0000 | protein_co | 0.691014 | 4.55E-72 |
| EOGT     | ENSG0000 | protein_co | 0.691277 | 0        |
| GPM6B    | ENSG0000 | protein_co | 0.691762 | 0        |
| PDGFRA   | ENSG0000 | protein_co | 0.691858 | 0        |
| SLC47A1  | ENSG0000 | protein_co | 0.692218 | 0        |
| ZEB2     | ENSG0000 | protein_co | 0.69266  | 0        |
| CAMK1G   | ENSG0000 | protein_co | 0.692695 | 0        |
| EFEMP1   | ENSG0000 | protein_co | 0.69272  | 0        |
| SH3PXD2B | ENSG0000 | protein_co | 0.69273  | 0        |
| TBX5     | ENSG0000 | protein_co | 0.69321  | 1.06E-72 |
| CAV2     | ENSG0000 | protein_co | 0.693362 | 0        |
| KCNJ8    | ENSG0000 | protein_co | 0.693844 | 0        |
| GIPC2    | ENSG0000 | protein_co | 0.694052 | 0        |
| CCDC181  | ENSG0000 | protein_co | 0.694945 | 0        |
| SMIM10   | ENSG0000 | protein_co | 0.695011 | 0        |

|          |          |            |          |          |
|----------|----------|------------|----------|----------|
| SCN2B    | ENSG0000 | protein_co | 0.695338 | 2.57E-73 |
| SLC16A2  | ENSG0000 | protein_co | 0.696077 | 0        |
| SLMAP    | ENSG0000 | protein_co | 0.697163 | 0        |
| SEC23A   | ENSG0000 | protein_co | 0.697394 | 0        |
| ALDH1L2  | ENSG0000 | protein_co | 0.697735 | 0        |
| COL13A1  | ENSG0000 | protein_co | 0.698411 | 0        |
| ADGRL3   | ENSG0000 | protein_co | 0.698883 | 0        |
| TIMP2    | ENSG0000 | protein_co | 0.700031 | 0        |
| PRKG1    | ENSG0000 | protein_co | 0.700638 | 0        |
| VWA5A    | ENSG0000 | protein_co | 0.700743 | 0        |
| CAV1     | ENSG0000 | protein_co | 0.702083 | 0        |
| CTTNBP2  | ENSG0000 | protein_co | 0.702397 | 0        |
| DSE      | ENSG0000 | protein_co | 0.702467 | 0        |
| RASL12   | ENSG0000 | protein_co | 0.702542 | 0        |
| C3orf70  | ENSG0000 | protein_co | 0.702732 | 0        |
| MAP3K20  | ENSG0000 | protein_co | 0.702968 | 0        |
| TRPC1    | ENSG0000 | protein_co | 0.703211 | 0        |
| KIAA1614 | ENSG0000 | protein_co | 0.703245 | 0        |
| LRRK2    | ENSG0000 | protein_co | 0.704321 | 0        |
| HRH2     | ENSG0000 | protein_co | 0.705458 | 2.51E-76 |
| FLNA     | ENSG0000 | protein_co | 0.705524 | 0        |
| PAK3     | ENSG0000 | protein_co | 0.705652 | 0        |
| ATP1A2   | ENSG0000 | protein_co | 0.705898 | 0        |
| SYT11    | ENSG0000 | protein_co | 0.706073 | 0        |
| PARVA    | ENSG0000 | protein_co | 0.706186 | 0        |
| TMEM132  | ENSG0000 | protein_co | 0.706993 | 8.55E-77 |
| MITF     | ENSG0000 | protein_co | 0.707396 | 0        |
| ZCCHC24  | ENSG0000 | protein_co | 0.707505 | 0        |
| GSTM5    | ENSG0000 | protein_co | 0.707751 | 0        |
| FOXF1    | ENSG0000 | protein_co | 0.708388 | 0        |
| ITIH5    | ENSG0000 | protein_co | 0.708873 | 0        |
| SLC16A4  | ENSG0000 | protein_co | 0.709105 | 0        |
| ANGPTL1  | ENSG0000 | protein_co | 0.709564 | 0        |
| CCDC178  | ENSG0000 | protein_co | 0.710691 | 0        |
| FLNC     | ENSG0000 | protein_co | 0.711064 | 0        |
| FXVD6    | ENSG0000 | protein_co | 0.711194 | 0        |
| KCNMA1   | ENSG0000 | protein_co | 0.711339 | 0        |
| MEIS2    | ENSG0000 | protein_co | 0.711719 | 0        |
| NECAB1   | ENSG0000 | protein_co | 0.712759 | 0        |
| ASXL3    | ENSG0000 | protein_co | 0.713208 | 0        |
| GNAO1    | ENSG0000 | protein_co | 0.713624 | 0        |
| CFL2     | ENSG0000 | protein_co | 0.713684 | 0        |
| KY       | ENSG0000 | protein_co | 0.714097 | 5.33E-79 |
| TSPAN18  | ENSG0000 | protein_co | 0.7147   | 0        |
| SPARCL1  | ENSG0000 | protein_co | 0.715788 | 0        |
| MPP2     | ENSG0000 | protein_co | 0.715847 | 0        |
| ATP2B4   | ENSG0000 | protein_co | 0.71597  | 0        |
| GLI2     | ENSG0000 | protein_co | 0.716036 | 0        |
| COL4A6   | ENSG0000 | protein_co | 0.716065 | 0        |
| PPP1R12B | ENSG0000 | protein_co | 0.716233 | 0        |
| FGFR1    | ENSG0000 | protein_co | 0.7165   | 0        |
| SYNPO2   | ENSG0000 | protein_co | 0.716672 | 0        |
| FREM2    | ENSG0000 | protein_co | 0.716758 | 7.65E-80 |
| DKK3     | ENSG0000 | protein_co | 0.71722  | 0        |
| EVS2     | ENSG0000 | protein_co | 0.717769 | 3.64E-80 |
| NT5E     | ENSG0000 | protein_co | 0.718367 | 0        |
| SVIL     | ENSG0000 | protein_co | 0.718482 | 0        |
| ANKRD33E | ENSG0000 | protein_co | 0.718734 | 0        |

|          |          |            |          |          |
|----------|----------|------------|----------|----------|
| ABCC9    | ENSG0000 | protein_co | 0.719766 | 0        |
| TMLHE    | ENSG0000 | protein_co | 0.72056  | 0        |
| MEIS1    | ENSG0000 | protein_co | 0.720697 | 0        |
| LMOD1    | ENSG0000 | protein_co | 0.720954 | 0        |
| KLHL14   | ENSG0000 | protein_co | 0.720955 | 0        |
| KCNAB1   | ENSG0000 | protein_co | 0.721516 | 0        |
| UBXN10   | ENSG0000 | protein_co | 0.722153 | 0        |
| C1QTNF7  | ENSG0000 | protein_co | 0.722927 | 0        |
| BNC2     | ENSG0000 | protein_co | 0.723192 | 0        |
| GCNT4    | ENSG0000 | protein_co | 0.723216 | 0        |
| SRD5A2   | ENSG0000 | protein_co | 0.723355 | 0        |
| LDB3     | ENSG0000 | protein_co | 0.726097 | 0        |
| SLC51B   | ENSG0000 | protein_co | 0.726441 | 5.38E-83 |
| B3GALT2  | ENSG0000 | protein_co | 0.726737 | 0        |
| IL33     | ENSG0000 | protein_co | 0.726951 | 0        |
| ARHGAP20 | ENSG0000 | protein_co | 0.727131 | 0        |
| MYH11    | ENSG0000 | protein_co | 0.727349 | 0        |
| SEMA3A   | ENSG0000 | protein_co | 0.727844 | 0        |
| PGM5     | ENSG0000 | protein_co | 0.728189 | 0        |
| HMGCLL1  | ENSG0000 | protein_co | 0.728253 | 1.34E-83 |
| RASGRF2  | ENSG0000 | protein_co | 0.728423 | 0        |
| ADAMTS5  | ENSG0000 | protein_co | 0.728972 | 0        |
| ITGA1    | ENSG0000 | protein_co | 0.72985  | 0        |
| DPYSL3   | ENSG0000 | protein_co | 0.730122 | 0        |
| CLIP3    | ENSG0000 | protein_co | 0.730807 | 0        |
| AOC3     | ENSG0000 | protein_co | 0.731161 | 0        |
| ITGA9    | ENSG0000 | protein_co | 0.731772 | 0        |
| TNS1     | ENSG0000 | protein_co | 0.731888 | 0        |
| GPRASP1  | ENSG0000 | protein_co | 0.73197  | 0        |
| HLF      | ENSG0000 | protein_co | 0.732353 | 0        |
| RAB9B    | ENSG0000 | protein_co | 0.733208 | 0        |
| ANO5     | ENSG0000 | protein_co | 0.733631 | 0        |
| C7       | ENSG0000 | protein_co | 0.734549 | 0        |
| PDE5A    | ENSG0000 | protein_co | 0.735188 | 0        |
| ATRN1    | ENSG0000 | protein_co | 0.736011 | 0        |
| SORBS1   | ENSG0000 | protein_co | 0.73618  | 0        |
| EDNRA    | ENSG0000 | protein_co | 0.737579 | 0        |
| MYOCD    | ENSG0000 | protein_co | 0.738036 | 0        |
| CPED1    | ENSG0000 | protein_co | 0.738189 | 0        |
| NEGR1    | ENSG0000 | protein_co | 0.739077 | 0        |
| LRP1B    | ENSG0000 | protein_co | 0.739199 | 2.31E-87 |
| PCDH9    | ENSG0000 | protein_co | 0.739471 | 0        |
| TENM3    | ENSG0000 | protein_co | 0.739615 | 0        |
| PRICKLE2 | ENSG0000 | protein_co | 0.739788 | 0        |
| ASPA     | ENSG0000 | protein_co | 0.73983  | 0        |
| CLIC6    | ENSG0000 | protein_co | 0.739849 | 0        |
| HS3ST3A1 | ENSG0000 | protein_co | 0.740037 | 0        |
| BHMT2    | ENSG0000 | protein_co | 0.740218 | 0        |
| MASP1    | ENSG0000 | protein_co | 0.740806 | 0        |
| FGF7     | ENSG0000 | protein_co | 0.741122 | 0        |
| GFRA1    | ENSG0000 | protein_co | 0.741243 | 0        |
| CLIP4    | ENSG0000 | protein_co | 0.742296 | 0        |
| RGS22    | ENSG0000 | protein_co | 0.742708 | 0        |
| FLRT2    | ENSG0000 | protein_co | 0.742841 | 0        |
| SLC24A3  | ENSG0000 | protein_co | 0.743454 | 0        |
| ADGRA2   | ENSG0000 | protein_co | 0.743715 | 0        |
| HACD4    | ENSG0000 | protein_co | 0.744028 | 0        |
| KANK2    | ENSG0000 | protein_co | 0.744231 | 0        |

|          |          |            |          |          |
|----------|----------|------------|----------|----------|
| PCDH10   | ENSG0000 | protein_co | 0.744577 | 0        |
| DAAM2    | ENSG0000 | protein_co | 0.745071 | 0        |
| FAT3     | ENSG0000 | protein_co | 0.74525  | 0        |
| PRTFDC1  | ENSG0000 | protein_co | 0.746065 | 0        |
| MATN2    | ENSG0000 | protein_co | 0.746146 | 0        |
| METTL24  | ENSG0000 | protein_co | 0.747247 | 2.98E-90 |
| MAMLD1   | ENSG0000 | protein_co | 0.747621 | 0        |
| FAXDC2   | ENSG0000 | protein_co | 0.7483   | 0        |
| ACSS3    | ENSG0000 | protein_co | 0.748464 | 0        |
| CACHD1   | ENSG0000 | protein_co | 0.748504 | 0        |
| ADAM22   | ENSG0000 | protein_co | 0.749746 | 0        |
| TMEM200f | ENSG0000 | protein_co | 0.750944 | 0        |
| TMEM252  | ENSG0000 | protein_co | 0.752319 | 3.95E-92 |
| NEXN     | ENSG0000 | protein_co | 0.754871 | 0        |
| C8orf88  | ENSG0000 | protein_co | 0.755084 | 0        |
| ANO6     | ENSG0000 | protein_co | 0.755213 | 0        |
| TCF21    | ENSG0000 | protein_co | 0.756211 | 0        |
| PTGIS    | ENSG0000 | protein_co | 0.756603 | 0        |
| NRK      | ENSG0000 | protein_co | 0.75673  | 0        |
| VCL      | ENSG0000 | protein_co | 0.756809 | 0        |
| PRKCB    | ENSG0000 | protein_co | 0.757036 | 0        |
| SORCS2   | ENSG0000 | protein_co | 0.757704 | 0        |
| TMEM35A  | ENSG0000 | protein_co | 0.75839  | 0        |
| PTGER2   | ENSG0000 | protein_co | 0.758524 | 0        |
| PALLD    | ENSG0000 | protein_co | 0.759289 | 0        |
| IRAG1    | ENSG0000 | protein_co | 0.759859 | 0        |
| FZD7     | ENSG0000 | protein_co | 0.760065 | 0        |
| ZNF423   | ENSG0000 | protein_co | 0.760072 | 0        |
| HEPH     | ENSG0000 | protein_co | 0.76019  | 0        |
| MSRB3    | ENSG0000 | protein_co | 0.760808 | 0        |
| PDGFC    | ENSG0000 | protein_co | 0.761058 | 0        |
| FERMT2   | ENSG0000 | protein_co | 0.761556 | 0        |
| LRFN5    | ENSG0000 | protein_co | 0.762248 | 0        |
| MKX      | ENSG0000 | protein_co | 0.762966 | 0        |
| RBMS3    | ENSG0000 | protein_co | 0.76333  | 0        |
| EYA4     | ENSG0000 | protein_co | 0.76348  | 0        |
| NLGN3    | ENSG0000 | protein_co | 0.764923 | 0        |
| STAC     | ENSG0000 | protein_co | 0.76596  | 0        |
| FAT4     | ENSG0000 | protein_co | 0.768115 | 0        |
| NDNF     | ENSG0000 | protein_co | 0.769095 | 0        |
| ADRA1A   | ENSG0000 | protein_co | 0.770646 | 0        |
| FGF2     | ENSG0000 | protein_co | 0.771639 | 0        |
| MYLK     | ENSG0000 | protein_co | 0.771831 | 0        |
| DDR2     | ENSG0000 | protein_co | 0.773884 | 0        |
| CHRD1    | ENSG0000 | protein_co | 0.774867 | 0        |
| CDC42EP3 | ENSG0000 | protein_co | 0.775236 | 0        |
| PRNP     | ENSG0000 | protein_co | 0.775905 | 0        |
| TGFBR3   | ENSG0000 | protein_co | 0.776813 | 0        |
| TSLP     | ENSG0000 | protein_co | 0.778278 | 0        |
| FGF10    | ENSG0000 | protein_co | 0.778696 | 1.1E-102 |
| SSPN     | ENSG0000 | protein_co | 0.782621 | 0        |
| FRMD6    | ENSG0000 | protein_co | 0.783033 | 0        |
| ADCY5    | ENSG0000 | protein_co | 0.783275 | 0        |
| TRPC4    | ENSG0000 | protein_co | 0.783456 | 0        |
| VSTM4    | ENSG0000 | protein_co | 0.7837   | 0        |
| ZNF804A  | ENSG0000 | protein_co | 0.783853 | 6.4E-105 |
| OLFML1   | ENSG0000 | protein_co | 0.784847 | 0        |
| SCN7A    | ENSG0000 | protein_co | 0.788814 | 0        |

|        |          |            |          |   |
|--------|----------|------------|----------|---|
| MAMDC2 | ENSG0000 | protein_co | 0.79024  | 0 |
| PCDH18 | ENSG0000 | protein_co | 0.792653 | 0 |
| EPHA3  | ENSG0000 | protein_co | 0.793872 | 0 |
| OGN    | ENSG0000 | protein_co | 0.79422  | 0 |
| PGR    | ENSG0000 | protein_co | 0.79618  | 0 |
| CLMP   | ENSG0000 | protein_co | 0.797488 | 0 |
| CNTN1  | ENSG0000 | protein_co | 0.801029 | 0 |
| SLC8A1 | ENSG0000 | protein_co | 0.801823 | 0 |
| JAZF1  | ENSG0000 | protein_co | 0.811539 | 0 |
| ANGPT1 | ENSG0000 | protein_co | 0.816632 | 0 |
| SPON1  | ENSG0000 | protein_co | 0.817729 | 0 |
| TRHDE  | ENSG0000 | protein_co | 0.823513 | 0 |

Supplementary Dataset File\_1 : Correlation analysis revealed 1170 genes with  $|R^2| > 0.5$  and  $P < 0.0$

ted to SPOCK3 expression.













































05 that were thought to be related to SPOCK3 expression.
