# Supplementary material for: Mechanism of prognostic marker SPOCK3 affecting malignant progression of prostate cancer and construction of prognostic model
Source: PubMed Central journal article supplement (PMC10416445; doi:10.1186/s12885-023-11151-3), 2023-08-11
Supplement: 12885_2023_11151_MOESM2_ESM.pdf [file 12885_2023_11151_MOESM2_ESM.pdf]

Differential Expression Analysis: 2.363 low-expressed genes and 287 high-expre

| gene_name | gene_id         | gene_biotype   | log2FoldChange |
|-----------|-----------------|----------------|----------------|
| EDDM3A    | ENSG00000181562 | protein_coding | -10.11009701   |
| SEMG1     | ENSG00000124233 | protein_coding | -9.767394766   |
| EDDM3B    | ENSG00000181552 | protein_coding | -9.715328144   |
| SEMG2     | ENSG00000124157 | protein_coding | -9.528343781   |
| AQP2      | ENSG00000167580 | protein_coding | -9.3209732     |
| PAEP      | ENSG00000122133 | protein_coding | -9.282709765   |
| PATE4     | ENSG00000237353 | protein_coding | -9.231914403   |
| TMEM114   | ENSG00000232258 | protein_coding | -9.103129357   |
| DEFB131A  | ENSG00000186146 | protein_coding | -8.967078595   |
| CRISP1    | ENSG00000124812 | protein_coding | -8.772469396   |
| PATE1     | ENSG00000171053 | protein_coding | -8.579052958   |
| CLDN2     | ENSG00000165376 | protein_coding | -7.95133202    |
| POU3F3    | ENSG00000198914 | protein_coding | -7.881854826   |
| SCGB1D4   | ENSG00000197745 | protein_coding | -7.652651415   |
| SPINK2    | ENSG00000128040 | protein_coding | -7.45630499    |
| PIP       | ENSG00000159763 | protein_coding | -7.391005432   |
| GRXCR1    | ENSG00000215203 | protein_coding | -7.35765617    |
| EMX2      | ENSG00000170370 | protein_coding | -6.827404938   |
| SERPINA5  | ENSG00000188488 | protein_coding | -6.820071881   |
| SULT2A1   | ENSG00000105398 | protein_coding | -6.656379488   |
| LHX1      | ENSG00000273706 | protein_coding | -6.392395268   |
| SLC13A2   | ENSG00000007216 | protein_coding | -6.344196041   |
| HOXB8     | ENSG00000120068 | protein_coding | -6.301418855   |
| MFSD2A    | ENSG00000168389 | protein_coding | -6.007381998   |
| PATE3     | ENSG00000236027 | protein_coding | -5.988253199   |
| SIM1      | ENSG00000112246 | protein_coding | -5.896323251   |
| LCN1      | ENSG00000160349 | protein_coding | -5.882851534   |
| UGT2B7    | ENSG00000171234 | protein_coding | -5.673111612   |
| SPINK13   | ENSG00000214510 | protein_coding | -5.607469751   |
| ANXA13    | ENSG00000104537 | protein_coding | -5.559582893   |
| CES5A     | ENSG00000159398 | protein_coding | -5.535781233   |
| SPINT3    | ENSG00000101446 | protein_coding | -5.480492295   |
| PATE2     | ENSG00000196844 | protein_coding | -5.47958818    |
| KCNJ16    | ENSG00000153822 | protein_coding | -5.333717625   |
| MCF2      | ENSG00000101977 | protein_coding | -5.315010941   |
| OPRPN     | ENSG00000171199 | protein_coding | -5.247990665   |
| DEFB129   | ENSG00000125903 | protein_coding | -5.218226768   |
| FAM83A    | ENSG00000147689 | protein_coding | -5.129211223   |
| KRT24     | ENSG00000167916 | protein_coding | -5.096650833   |
| ACSL6     | ENSG00000164398 | protein_coding | -5.045341526   |
| CDX4      | ENSG00000131264 | protein_coding | -5.023441157   |
| MUC6      | ENSG00000184956 | protein_coding | -5.00719775    |
| HS3ST5    | ENSG00000249853 | protein_coding | -4.982882783   |
| WFDC9     | ENSG00000180205 | protein_coding | -4.953259536   |
| WNT9B     | ENSG00000158955 | protein_coding | -4.938283125   |
| SLCO4C1   | ENSG00000173930 | protein_coding | -4.850375153   |
| OR5AU1    | ENSG00000169327 | protein_coding | -4.789771742   |
| MGAM      | ENSG00000257335 | protein_coding | -4.767172844   |
| SLC26A3   | ENSG00000091138 | protein_coding | -4.765920173   |
| PNMT      | ENSG00000141744 | protein_coding | -4.711131279   |
| NPFFR2    | ENSG00000056291 | protein_coding | -4.709688066   |
| HOXB6     | ENSG00000108511 | protein_coding | -4.633011641   |
| CYP19A1   | ENSG00000137869 | protein_coding | -4.632650366   |
| PRSS1     | ENSG00000204983 | protein_coding | -4.604559828   |
| SLC28A3   | ENSG00000197506 | protein_coding | -4.490452048   |
| CA2       | ENSG00000104267 | protein_coding | -4.487043176   |

|          |                 |                |              |
|----------|-----------------|----------------|--------------|
| STAC2    | ENSG00000141750 | protein_coding | -4.463364219 |
| PIK3C2G  | ENSG00000139144 | protein_coding | -4.42262599  |
| SMR3B    | ENSG00000171201 | protein_coding | -4.417607703 |
| PADI3    | ENSG00000142619 | protein_coding | -4.362955789 |
| CRTAC1   | ENSG00000095713 | protein_coding | -4.337724458 |
| GPX6     | ENSG00000198704 | protein_coding | -4.33510571  |
| ATP13A4  | ENSG00000127249 | protein_coding | -4.303601998 |
| CYP4F8   | ENSG00000186526 | protein_coding | -4.296236304 |
| KLHL14   | ENSG00000197705 | protein_coding | -4.292959374 |
| RAD21L1  | ENSG00000244588 | protein_coding | -4.228040939 |
| SLC46A2  | ENSG00000119457 | protein_coding | -4.168732896 |
| FUT3     | ENSG00000171124 | protein_coding | -4.15761276  |
| PAX2     | ENSG00000075891 | protein_coding | -4.134796977 |
| RNASE12  | ENSG00000258436 | protein_coding | -4.128349829 |
| CLPSL1   | ENSG00000204140 | protein_coding | -4.040588898 |
| TFAP2B   | ENSG00000008196 | protein_coding | -4.012828346 |
| AKR1B1   | ENSG00000085662 | protein_coding | -3.920281531 |
| SLC39A2  | ENSG00000165794 | protein_coding | -3.894237035 |
| PLCZ1    | ENSG00000139151 | protein_coding | -3.851759101 |
| SLC16A12 | ENSG00000152779 | protein_coding | -3.808819581 |
| HOXB9    | ENSG00000170689 | protein_coding | -3.791843765 |
| CYSLTR2  | ENSG00000152207 | protein_coding | -3.763704415 |
| CDH16    | ENSG00000166589 | protein_coding | -3.751714398 |
| LPL      | ENSG00000175445 | protein_coding | -3.748818457 |
| THRSP    | ENSG00000151365 | protein_coding | -3.712339936 |
| C10orf99 | ENSG00000188373 | protein_coding | -3.65775326  |
| ADCY8    | ENSG00000155897 | protein_coding | -3.656797159 |
| GPR149   | ENSG00000174948 | protein_coding | -3.646297426 |
| SLPI     | ENSG00000124107 | protein_coding | -3.622202463 |
| HSPA6    | ENSG00000173110 | protein_coding | -3.590306877 |
| HOXB5    | ENSG00000120075 | protein_coding | -3.56186064  |
| KCP      | ENSG00000135253 | protein_coding | -3.538044295 |
| CCDC198  | ENSG00000100557 | protein_coding | -3.526056059 |
| RASL10B  | ENSG00000270885 | protein_coding | -3.517314084 |
| ATP6V1G3 | ENSG00000151418 | protein_coding | -3.511744005 |
| TMEM238  | ENSG00000263429 | protein_coding | -3.500793407 |
| RHEX     | ENSG00000263961 | protein_coding | -3.416977741 |
| NDRG4    | ENSG00000103034 | protein_coding | -3.399540056 |
| LCN15    | ENSG00000177984 | protein_coding | -3.397785792 |
| GSTM1    | ENSG00000134184 | protein_coding | -3.387100254 |
| PON3     | ENSG00000105852 | protein_coding | -3.371106884 |
| LCN8     | ENSG00000204001 | protein_coding | -3.367635232 |
| TNMD     | ENSG00000000005 | protein_coding | -3.335402029 |
| KCNJ15   | ENSG00000157551 | protein_coding | -3.316591722 |
| SPRR3    | ENSG00000163209 | protein_coding | -3.305146756 |
| LYZL1    | ENSG00000120563 | protein_coding | -3.30491386  |
| LY6D     | ENSG00000167656 | protein_coding | -3.29467944  |
| CAPZA3   | ENSG00000177938 | protein_coding | -3.285710469 |
| KCNH5    | ENSG00000140015 | protein_coding | -3.274675603 |
| SLC9A4   | ENSG00000180251 | protein_coding | -3.265132104 |
| IL19     | ENSG00000142224 | protein_coding | -3.253636611 |
| TRPM5    | ENSG00000070985 | protein_coding | -3.232161967 |
| PAX8     | ENSG00000125618 | protein_coding | -3.212414111 |
| SLC34A2  | ENSG00000157765 | protein_coding | -3.206549932 |
| ADTRP    | ENSG00000111863 | protein_coding | -3.194483405 |
| MUC21    | ENSG00000204544 | protein_coding | -3.180636261 |
| LCE1C    | ENSG00000197084 | protein_coding | -3.180279315 |
| KCNJ5    | ENSG00000120457 | protein_coding | -3.161354172 |

|          |                 |                |              |
|----------|-----------------|----------------|--------------|
| MRO      | ENSG00000134042 | protein_coding | -3.143774442 |
| DCAF12L1 | ENSG00000198889 | protein_coding | -3.121491442 |
| RASAL1   | ENSG00000111344 | protein_coding | -3.120549818 |
| SNAP25   | ENSG00000132639 | protein_coding | -3.108540922 |
| CABS1    | ENSG00000145309 | protein_coding | -3.106244709 |
| TRH      | ENSG00000170893 | protein_coding | -3.093265224 |
| PTGES    | ENSG00000148344 | protein_coding | -3.087222627 |
| CLPSL2   | ENSG00000196748 | protein_coding | -3.08383232  |
| KIRREL3  | ENSG00000149571 | protein_coding | -3.068793655 |
| TMEM171  | ENSG00000157111 | protein_coding | -3.068508771 |
| DMRT2    | ENSG00000173253 | protein_coding | -3.064303424 |
| PDK4     | ENSG00000004799 | protein_coding | -3.061796678 |
| PTGS2    | ENSG00000073756 | protein_coding | -3.060776152 |
| ADGRD2   | ENSG00000180264 | protein_coding | -3.048154694 |
| FAM163B  | ENSG00000196990 | protein_coding | -3.036697386 |
| CLCA2    | ENSG00000137975 | protein_coding | -3.028952926 |
| KRT13    | ENSG00000171401 | protein_coding | -3.014508109 |
| ELSPBP1  | ENSG00000169393 | protein_coding | -2.998589815 |
| TMEM213  | ENSG00000214128 | protein_coding | -2.985353154 |
| ATP10B   | ENSG00000118322 | protein_coding | -2.969536392 |
| FAM167A  | ENSG00000154319 | protein_coding | -2.948234356 |
| NEFM     | ENSG00000104722 | protein_coding | -2.933510319 |
| PALM3    | ENSG00000187867 | protein_coding | -2.91353948  |
| ANO1     | ENSG00000131620 | protein_coding | -2.911862525 |
| FAM83C   | ENSG00000125998 | protein_coding | -2.900781045 |
| DUOXA2   | ENSG00000140274 | protein_coding | -2.900143506 |
| WFDC8    | ENSG00000158901 | protein_coding | -2.890404657 |
| SMR3A    | ENSG00000109208 | protein_coding | -2.890177033 |
| REG3G    | ENSG00000143954 | protein_coding | -2.876511502 |
| ABCG2    | ENSG00000118777 | protein_coding | -2.855022043 |
| EPPIN    | ENSG00000101448 | protein_coding | -2.853493217 |
| KCNJ1    | ENSG00000151704 | protein_coding | -2.848592147 |
| LIPG     | ENSG00000101670 | protein_coding | -2.846215216 |
| ARC      | ENSG00000198576 | protein_coding | -2.836226149 |
| TMPRSS11 | ENSG00000187054 | protein_coding | -2.835262616 |
| DEFB134  | ENSG00000205882 | protein_coding | -2.832731479 |
| PLAAT1   | ENSG00000127252 | protein_coding | -2.832001409 |
| PRR35    | ENSG00000161992 | protein_coding | -2.818128399 |
| SFRP5    | ENSG00000120057 | protein_coding | -2.814046038 |
| IL20     | ENSG00000162891 | protein_coding | -2.804050422 |
| KCNS1    | ENSG00000124134 | protein_coding | -2.789358152 |
| TMEM196  | ENSG00000173452 | protein_coding | -2.760611053 |
| SLC2A9   | ENSG00000109667 | protein_coding | -2.744319149 |
| ITLN1    | ENSG00000179914 | protein_coding | -2.734443262 |
| NXPH2    | ENSG00000144227 | protein_coding | -2.728137349 |
| ROS1     | ENSG00000047936 | protein_coding | -2.727520549 |
| MUC15    | ENSG00000169550 | protein_coding | -2.716786979 |
| KCNJ13   | ENSG00000115474 | protein_coding | -2.71152574  |
| MSLN     | ENSG00000102854 | protein_coding | -2.708194188 |
| ATP1A4   | ENSG00000132681 | protein_coding | -2.704594739 |
| FBP2     | ENSG00000130957 | protein_coding | -2.699053363 |
| SYT8     | ENSG00000149043 | protein_coding | -2.687230775 |
| CHRM2    | ENSG00000181072 | protein_coding | -2.687148555 |
| CA14     | ENSG00000118298 | protein_coding | -2.681576652 |
| MAGEA11  | ENSG00000185247 | protein_coding | -2.679311506 |
| CXCR2    | ENSG00000180871 | protein_coding | -2.662407028 |
| EVA1A    | ENSG00000115363 | protein_coding | -2.660184317 |
| TGM4     | ENSG00000163810 | protein_coding | -2.659338004 |

|          |                 |                |              |
|----------|-----------------|----------------|--------------|
| TRIM31   | ENSG00000204616 | protein_coding | -2.657193731 |
| HTR1A    | ENSG00000178394 | protein_coding | -2.650373546 |
| OPCML    | ENSG00000183715 | protein_coding | -2.649707571 |
| HSD17B13 | ENSG00000170509 | protein_coding | -2.638801355 |
| COLEC10  | ENSG00000184374 | protein_coding | -2.636941582 |
| AGXT2    | ENSG00000113492 | protein_coding | -2.633889383 |
| PRDM16   | ENSG00000142611 | protein_coding | -2.633417414 |
| CLU      | ENSG00000120885 | protein_coding | -2.627976958 |
| DUOX2    | ENSG00000140279 | protein_coding | -2.625617097 |
| PAQR8    | ENSG00000170915 | protein_coding | -2.616673733 |
| CLDN19   | ENSG00000164007 | protein_coding | -2.616113217 |
| SLC18A2  | ENSG00000165646 | protein_coding | -2.604942607 |
| ACTC1    | ENSG00000159251 | protein_coding | -2.602829154 |
| AL163195 | ENSG00000259060 | protein_coding | -2.599583835 |
| HOXB7    | ENSG00000260027 | protein_coding | -2.590367726 |
| MYH6     | ENSG00000197616 | protein_coding | -2.585967834 |
| GKN1     | ENSG00000169605 | protein_coding | -2.582011242 |
| C21orf62 | ENSG00000205929 | protein_coding | -2.570298156 |
| GPRC6A   | ENSG00000173612 | protein_coding | -2.564551513 |
| PTGS1    | ENSG00000095303 | protein_coding | -2.560127808 |
| GPX2     | ENSG00000176153 | protein_coding | -2.559623535 |
| PLA2G3   | ENSG00000100078 | protein_coding | -2.551892175 |
| CYP4F22  | ENSG00000171954 | protein_coding | -2.547482582 |
| ADAMTS1  | ENSG00000140873 | protein_coding | -2.541729277 |
| OVCH2    | ENSG00000183378 | protein_coding | -2.538868124 |
| GNAO1    | ENSG00000087258 | protein_coding | -2.537708313 |
| DSG4     | ENSG00000175065 | protein_coding | -2.537425189 |
| TMEM132  | ENSG00000181234 | protein_coding | -2.53543518  |
| GAS2L2   | ENSG00000270765 | protein_coding | -2.532401498 |
| CLCA4    | ENSG00000016602 | protein_coding | -2.530765264 |
| DCC      | ENSG00000187323 | protein_coding | -2.520757671 |
| ATP2B3   | ENSG00000067842 | protein_coding | -2.517402141 |
| ATP6V0A4 | ENSG00000105929 | protein_coding | -2.51314096  |
| SCGB1A1  | ENSG00000149021 | protein_coding | -2.510464678 |
| KRT27    | ENSG00000171446 | protein_coding | -2.497044204 |
| SIAH3    | ENSG00000215475 | protein_coding | -2.474369749 |
| GCNT4    | ENSG00000176928 | protein_coding | -2.470876633 |
| AMELX    | ENSG00000125363 | protein_coding | -2.462849462 |
| ADRB3    | ENSG00000188778 | protein_coding | -2.4611725   |
| LRCOL1   | ENSG00000204583 | protein_coding | -2.46054829  |
| KRT16    | ENSG00000186832 | protein_coding | -2.451594779 |
| STAC     | ENSG00000144681 | protein_coding | -2.451133765 |
| AOX1     | ENSG00000138356 | protein_coding | -2.449926239 |
| QPRT     | ENSG00000103485 | protein_coding | -2.449011913 |
| CCNI2    | ENSG00000205089 | protein_coding | -2.4466169   |
| ADGRG4   | ENSG00000156920 | protein_coding | -2.445982784 |
| GPD1     | ENSG00000167588 | protein_coding | -2.44448284  |
| KCNA4    | ENSG00000182255 | protein_coding | -2.433329303 |
| LINGO2   | ENSG00000174482 | protein_coding | -2.421193134 |
| DUSP2    | ENSG00000158050 | protein_coding | -2.41697583  |
| VWA5B2   | ENSG00000145198 | protein_coding | -2.409941416 |
| FUT6     | ENSG00000156413 | protein_coding | -2.404445486 |
| C2orf88  | ENSG00000187699 | protein_coding | -2.399405498 |
| KY       | ENSG00000174611 | protein_coding | -2.39749599  |
| GLRA4    | ENSG00000188828 | protein_coding | -2.386489483 |
| SYT10    | ENSG00000110975 | protein_coding | -2.385362851 |
| DEFB132  | ENSG00000186458 | protein_coding | -2.385184903 |
| CRNN     | ENSG00000143536 | protein_coding | -2.382760977 |

|         |                 |                |              |
|---------|-----------------|----------------|--------------|
| SLITRK3 | ENSG00000121871 | protein_coding | -2.378787043 |
| PYY     | ENSG00000131096 | protein_coding | -2.378543783 |
| FOXI2   | ENSG00000186766 | protein_coding | -2.369614485 |
| CST4    | ENSG00000101441 | protein_coding | -2.369381075 |
| CBLN4   | ENSG00000054803 | protein_coding | -2.364776732 |
| UGT3A1  | ENSG00000145626 | protein_coding | -2.357719224 |
| PLA2G4A | ENSG00000116711 | protein_coding | -2.3571451   |
| SFTPC   | ENSG00000168484 | protein_coding | -2.348702134 |
| HTR1E   | ENSG00000168830 | protein_coding | -2.342484853 |
| TRPM3   | ENSG00000083067 | protein_coding | -2.342149893 |
| LRRC3B  | ENSG00000179796 | protein_coding | -2.340418177 |
| WFDC2   | ENSG00000101443 | protein_coding | -2.339642631 |
| KRT222  | ENSG00000213424 | protein_coding | -2.336133311 |
| ASTL    | ENSG00000188886 | protein_coding | -2.334504027 |
| GSTM3   | ENSG00000134202 | protein_coding | -2.334412618 |
| SBSPON  | ENSG00000164764 | protein_coding | -2.332604006 |
| CDH8    | ENSG00000150394 | protein_coding | -2.329684716 |
| G0S2    | ENSG00000123689 | protein_coding | -2.327631277 |
| LYVE1   | ENSG00000133800 | protein_coding | -2.324921202 |
| MATN4   | ENSG00000124159 | protein_coding | -2.323544058 |
| FOLR1   | ENSG00000110195 | protein_coding | -2.322715269 |
| WFDC10A | ENSG00000180305 | protein_coding | -2.316391141 |
| CCDC27  | ENSG00000162592 | protein_coding | -2.314886622 |
| KRT3    | ENSG00000186442 | protein_coding | -2.311755097 |
| CDO1    | ENSG00000129596 | protein_coding | -2.310911192 |
| CIDEC   | ENSG00000187288 | protein_coding | -2.293608412 |
| OR2T4   | ENSG00000196944 | protein_coding | -2.292506892 |
| ATP4B   | ENSG00000186009 | protein_coding | -2.291951119 |
| DMBT1   | ENSG00000187908 | protein_coding | -2.287644972 |
| MEI4    | ENSG00000269964 | protein_coding | -2.284285991 |
| SCN11A  | ENSG00000168356 | protein_coding | -2.282953462 |
| FRMD3   | ENSG00000172159 | protein_coding | -2.280846717 |
| TRIM9   | ENSG00000100505 | protein_coding | -2.277724645 |
| CRYGD   | ENSG00000118231 | protein_coding | -2.277204016 |
| HCAR3   | ENSG00000255398 | protein_coding | -2.275822042 |
| PDE1C   | ENSG00000154678 | protein_coding | -2.275142283 |
| SCARA5  | ENSG00000168079 | protein_coding | -2.271763536 |
| KBTBD13 | ENSG00000234438 | protein_coding | -2.266271015 |
| INSYN2B | ENSG00000204767 | protein_coding | -2.264506281 |
| EVX2    | ENSG00000174279 | protein_coding | -2.260179252 |
| WIF1    | ENSG00000156076 | protein_coding | -2.260178994 |
| IGSF1   | ENSG00000147255 | protein_coding | -2.25759205  |
| PCP4L1  | ENSG00000248485 | protein_coding | -2.256333758 |
| GATA3   | ENSG00000107485 | protein_coding | -2.254764491 |
| DPP6    | ENSG00000130226 | protein_coding | -2.254031037 |
| AQP5    | ENSG00000161798 | protein_coding | -2.249731651 |
| BMP5    | ENSG00000112175 | protein_coding | -2.247478105 |
| UNC5B   | ENSG00000107731 | protein_coding | -2.245731558 |
| PLAAT5  | ENSG00000168004 | protein_coding | -2.239220648 |
| RPE65   | ENSG00000116745 | protein_coding | -2.2365803   |
| CPNE6   | ENSG00000100884 | protein_coding | -2.235804749 |
| TBX4    | ENSG00000121075 | protein_coding | -2.233804111 |
| FAM110C | ENSG00000184731 | protein_coding | -2.233121786 |
| CLC     | ENSG00000105205 | protein_coding | -2.2270999   |
| LMO3    | ENSG00000048540 | protein_coding | -2.22452311  |
| SCGB3A1 | ENSG00000161055 | protein_coding | -2.223850129 |
| IVL     | ENSG00000163207 | protein_coding | -2.220951182 |
| ARSF    | ENSG00000062096 | protein_coding | -2.220515156 |

|           |                 |                |              |
|-----------|-----------------|----------------|--------------|
| C11orf87  | ENSG00000185742 | protein_coding | -2.21981067  |
| CAPN6     | ENSG00000077274 | protein_coding | -2.213969608 |
| LRRTM3    | ENSG00000198739 | protein_coding | -2.213824515 |
| IL1RL1    | ENSG00000115602 | protein_coding | -2.213546532 |
| CYP4B1    | ENSG00000142973 | protein_coding | -2.210904639 |
| PENK      | ENSG00000181195 | protein_coding | -2.209615096 |
| EPGN      | ENSG00000182585 | protein_coding | -2.203881665 |
| DUOXA1    | ENSG00000140254 | protein_coding | -2.202371818 |
| DCHS2     | ENSG00000197410 | protein_coding | -2.196115005 |
| MGAT4C    | ENSG00000182050 | protein_coding | -2.193341956 |
| SLC6A2    | ENSG00000103546 | protein_coding | -2.193244322 |
| PLPPR5    | ENSG00000117598 | protein_coding | -2.19251812  |
| CHP2      | ENSG00000166869 | protein_coding | -2.19091148  |
| C10orf82  | ENSG00000165863 | protein_coding | -2.189296577 |
| DUOX1     | ENSG00000137857 | protein_coding | -2.184419207 |
| FOXI1     | ENSG00000168269 | protein_coding | -2.183596971 |
| TMEM252   | ENSG00000181778 | protein_coding | -2.183477705 |
| KRT4      | ENSG00000170477 | protein_coding | -2.173509505 |
| FAM163A   | ENSG00000143340 | protein_coding | -2.163090266 |
| SLC31A2   | ENSG00000136867 | protein_coding | -2.163048076 |
| FOXQ1     | ENSG00000164379 | protein_coding | -2.161754639 |
| CASP14    | ENSG00000105141 | protein_coding | -2.156898919 |
| GJB4      | ENSG00000189433 | protein_coding | -2.154170405 |
| GLIS3     | ENSG00000107249 | protein_coding | -2.151109114 |
| S100A14   | ENSG00000189334 | protein_coding | -2.146860527 |
| BTN1A1    | ENSG00000124557 | protein_coding | -2.146598119 |
| EPHB1     | ENSG00000154928 | protein_coding | -2.141309541 |
| ASPA      | ENSG00000108381 | protein_coding | -2.138588767 |
| SH2D1B    | ENSG00000198574 | protein_coding | -2.135089694 |
| CPB2      | ENSG00000080618 | protein_coding | -2.12124651  |
| LGR6      | ENSG00000133067 | protein_coding | -2.119783957 |
| ATP6V0D2  | ENSG00000147614 | protein_coding | -2.111783155 |
| KLHL4     | ENSG00000102271 | protein_coding | -2.109368188 |
| TRIM61    | ENSG00000183439 | protein_coding | -2.107902486 |
| ANGPT1    | ENSG00000154188 | protein_coding | -2.105351463 |
| GSTP1     | ENSG00000084207 | protein_coding | -2.104205909 |
| KCNK10    | ENSG00000100433 | protein_coding | -2.102110117 |
| TGM5      | ENSG00000104055 | protein_coding | -2.101788009 |
| SP6       | ENSG00000189120 | protein_coding | -2.099282439 |
| LVRN      | ENSG00000172901 | protein_coding | -2.096953345 |
| JPH4      | ENSG00000092051 | protein_coding | -2.092322811 |
| OR7C1     | ENSG00000127530 | protein_coding | -2.091341544 |
| KCNF1     | ENSG00000162975 | protein_coding | -2.087354309 |
| APOBEC3C  | ENSG00000244509 | protein_coding | -2.086805352 |
| C20orf202 | ENSG00000215595 | protein_coding | -2.084974302 |
| CYP1A2    | ENSG00000140505 | protein_coding | -2.083039489 |
| ADRA1A    | ENSG00000120907 | protein_coding | -2.081515393 |
| TNFSF11   | ENSG00000120659 | protein_coding | -2.078287302 |
| HOXD4     | ENSG00000170166 | protein_coding | -2.076118324 |
| ZSCAN4    | ENSG00000180532 | protein_coding | -2.07382871  |
| FAM83B    | ENSG00000168143 | protein_coding | -2.066526933 |
| SERPINB5  | ENSG00000206075 | protein_coding | -2.065926813 |
| HOXB4     | ENSG00000182742 | protein_coding | -2.065015232 |
| IRX1      | ENSG00000170549 | protein_coding | -2.062428259 |
| RHCG      | ENSG00000140519 | protein_coding | -2.06174467  |
| CRABP1    | ENSG00000166426 | protein_coding | -2.061644315 |
| CHRNA4    | ENSG00000101204 | protein_coding | -2.06105896  |
| HCAR2     | ENSG00000182782 | protein_coding | -2.059230286 |

|           |                 |                |              |
|-----------|-----------------|----------------|--------------|
| IL1A      | ENSG00000115008 | protein_coding | -2.057893291 |
| BRINP2    | ENSG00000198797 | protein_coding | -2.055641189 |
| CYP3A5    | ENSG00000106258 | protein_coding | -2.053111742 |
| ASTN1     | ENSG00000152092 | protein_coding | -2.050369626 |
| ZNF185    | ENSG00000147394 | protein_coding | -2.048976806 |
| HPCAL4    | ENSG00000116983 | protein_coding | -2.046949896 |
| OLFM4     | ENSG00000102837 | protein_coding | -2.044927494 |
| KCTD14    | ENSG00000151364 | protein_coding | -2.039532898 |
| ENPP3     | ENSG00000154269 | protein_coding | -2.03791437  |
| C8orf88   | ENSG00000253250 | protein_coding | -2.035605329 |
| MYLK      | ENSG00000065534 | protein_coding | -2.032628214 |
| HCN4      | ENSG00000138622 | protein_coding | -2.031471946 |
| GDF10     | ENSG00000266524 | protein_coding | -2.015491624 |
| TFF2      | ENSG00000160181 | protein_coding | -2.012250078 |
| GSTA2     | ENSG00000244067 | protein_coding | -2.009621543 |
| CRABP2    | ENSG00000143320 | protein_coding | -2.004316361 |
| NXPE4     | ENSG00000137634 | protein_coding | -2.000988349 |
| SERPINA6  | ENSG00000170099 | protein_coding | 2.000764663  |
| GJA3      | ENSG00000121743 | protein_coding | 2.003217796  |
| KLK15     | ENSG00000174562 | protein_coding | 2.004015516  |
| SSTR1     | ENSG00000139874 | protein_coding | 2.004104509  |
| ANKRD30E  | ENSG00000180777 | protein_coding | 2.008312997  |
| IBSP      | ENSG00000029559 | protein_coding | 2.009736694  |
| OR6F1     | ENSG00000169214 | protein_coding | 2.009768117  |
| TTR       | ENSG00000118271 | protein_coding | 2.011552292  |
| LHX2      | ENSG00000106689 | protein_coding | 2.016424572  |
| H3Y1      | ENSG00000269466 | protein_coding | 2.017076892  |
| H3C11     | ENSG00000275379 | protein_coding | 2.0284099    |
| TM4SF20   | ENSG00000168955 | protein_coding | 2.02967503   |
| DDX53     | ENSG00000184735 | protein_coding | 2.030988004  |
| HJURP     | ENSG00000123485 | protein_coding | 2.037374596  |
| TMEM212   | ENSG00000186329 | protein_coding | 2.038232051  |
| GRPR      | ENSG00000126010 | protein_coding | 2.039535059  |
| LINC00634 | ENSG00000205704 | protein_coding | 2.041093639  |
| ZMYND10   | ENSG00000004838 | protein_coding | 2.041669377  |
| F2RL2     | ENSG00000164220 | protein_coding | 2.042271062  |
| NETO2     | ENSG00000171208 | protein_coding | 2.043098764  |
| CDHR4     | ENSG00000187492 | protein_coding | 2.045124587  |
| AKAP14    | ENSG00000186471 | protein_coding | 2.051139366  |
| OTX1      | ENSG00000115507 | protein_coding | 2.055058287  |
| CHIT1     | ENSG00000133063 | protein_coding | 2.058558465  |
| GBX2      | ENSG00000168505 | protein_coding | 2.063829356  |
| OR2B6     | ENSG00000124657 | protein_coding | 2.067255178  |
| DMRTC2    | ENSG00000142025 | protein_coding | 2.070416714  |
| OR2H1     | ENSG00000204688 | protein_coding | 2.07594738   |
| ZBBX      | ENSG00000169064 | protein_coding | 2.078038252  |
| MYH13     | ENSG00000006788 | protein_coding | 2.08527253   |
| OR52I2    | ENSG00000226288 | protein_coding | 2.094020522  |
| CBLIF     | ENSG00000134812 | protein_coding | 2.09471262   |
| TDO2      | ENSG00000151790 | protein_coding | 2.098244875  |
| TEX19     | ENSG00000182459 | protein_coding | 2.099611459  |
| H2AC12    | ENSG00000274997 | protein_coding | 2.101076135  |
| NKX6-3    | ENSG00000165066 | protein_coding | 2.106797855  |
| ARMC3     | ENSG00000165309 | protein_coding | 2.110651463  |
| COMP      | ENSG00000105664 | protein_coding | 2.110761377  |
| UGT2B11   | ENSG00000213759 | protein_coding | 2.111057497  |
| TWIST1    | ENSG00000122691 | protein_coding | 2.119041834  |
| OR13G1    | ENSG00000197437 | protein_coding | 2.123676101  |

|           |                 |                |             |
|-----------|-----------------|----------------|-------------|
| EPHA10    | ENSG00000183317 | protein_coding | 2.124300882 |
| ULBP1     | ENSG00000111981 | protein_coding | 2.128267375 |
| SLC2A2    | ENSG00000163581 | protein_coding | 2.129175897 |
| CD5L      | ENSG00000073754 | protein_coding | 2.129497934 |
| CFAP65    | ENSG00000181378 | protein_coding | 2.129942166 |
| IGFBP1    | ENSG00000146678 | protein_coding | 2.130976385 |
| FNDC10    | ENSG00000228594 | protein_coding | 2.132966657 |
| CLEC18B   | ENSG00000140839 | protein_coding | 2.134344037 |
| DMBX1     | ENSG00000197587 | protein_coding | 2.134427317 |
| KRTAP5-1  | ENSG00000205869 | protein_coding | 2.136615774 |
| H4C5      | ENSG00000276966 | protein_coding | 2.136803664 |
| CACNA1D   | ENSG00000157388 | protein_coding | 2.137829066 |
| NEUROG2   | ENSG00000178403 | protein_coding | 2.152881403 |
| KIF4A     | ENSG00000090889 | protein_coding | 2.156046594 |
| OR51F2    | ENSG00000176925 | protein_coding | 2.158624076 |
| OR10G2    | ENSG00000255582 | protein_coding | 2.160411463 |
| ZP1       | ENSG00000149506 | protein_coding | 2.164462701 |
| H1-4      | ENSG00000168298 | protein_coding | 2.166004783 |
| UCN       | ENSG00000163794 | protein_coding | 2.168374854 |
| GLYATL1B  | ENSG00000255151 | protein_coding | 2.171349823 |
| GMNC      | ENSG00000205835 | protein_coding | 2.174254369 |
| MNX1      | ENSG00000130675 | protein_coding | 2.180147864 |
| BAIAP2L2  | ENSG00000128298 | protein_coding | 2.183528382 |
| MAGEA12   | ENSG00000213401 | protein_coding | 2.185597141 |
| SOX11     | ENSG00000176887 | protein_coding | 2.190261914 |
| TRIM49    | ENSG00000168930 | protein_coding | 2.194342443 |
| PLA2G2E   | ENSG00000188784 | protein_coding | 2.197175149 |
| SLC24A2   | ENSG00000155886 | protein_coding | 2.199909476 |
| SIM2      | ENSG00000159263 | protein_coding | 2.207743313 |
| CENPV3    | ENSG00000224109 | protein_coding | 2.208469773 |
| AC113554  | ENSG00000264813 | protein_coding | 2.214012947 |
| KLK14     | ENSG00000129437 | protein_coding | 2.216577188 |
| COL9A2    | ENSG00000049089 | protein_coding | 2.216686867 |
| AKR1D1    | ENSG00000122787 | protein_coding | 2.217095354 |
| NKAIN1    | ENSG00000084628 | protein_coding | 2.217324955 |
| EBF2      | ENSG00000221818 | protein_coding | 2.218258224 |
| COL10A1   | ENSG00000123500 | protein_coding | 2.219923509 |
| OR51G2    | ENSG00000176893 | protein_coding | 2.220446021 |
| LBX1      | ENSG00000138136 | protein_coding | 2.22209908  |
| MOV10L1   | ENSG00000073146 | protein_coding | 2.222290076 |
| C19orf81  | ENSG00000235034 | protein_coding | 2.242984859 |
| NPY       | ENSG00000122585 | protein_coding | 2.243538376 |
| ELAVL2    | ENSG00000107105 | protein_coding | 2.244801933 |
| SLCO1B3-1 | ENSG00000257046 | protein_coding | 2.25155974  |
| APOC1     | ENSG00000130208 | protein_coding | 2.251734835 |
| NWD2      | ENSG00000174145 | protein_coding | 2.252440697 |
| PAQR6     | ENSG00000160781 | protein_coding | 2.255044968 |
| AC233992  | ENSG00000271698 | protein_coding | 2.256107829 |
| OR52I1    | ENSG00000232268 | protein_coding | 2.256824507 |
| OR51L1    | ENSG00000176798 | protein_coding | 2.259433068 |
| SULT4A1   | ENSG00000130540 | protein_coding | 2.261228583 |
| DNAH5     | ENSG00000039139 | protein_coding | 2.263498606 |
| TNN       | ENSG00000120332 | protein_coding | 2.264130032 |
| SPON2     | ENSG00000159674 | protein_coding | 2.264747962 |
| FGA       | ENSG00000171560 | protein_coding | 2.270234424 |
| H2AC14    | ENSG00000276368 | protein_coding | 2.273445027 |
| NXPH1     | ENSG00000122584 | protein_coding | 2.274084304 |
| HOXC4     | ENSG00000198353 | protein_coding | 2.279793997 |



|           |                 |                |             |
|-----------|-----------------|----------------|-------------|
| SMIM28    | ENSG00000262543 | protein_coding | 2.292547127 |
| PANX3     | ENSG00000154143 | protein_coding | 2.293246486 |
| CST1      | ENSG00000170373 | protein_coding | 2.296631534 |
| TGM3      | ENSG00000125780 | protein_coding | 2.296925507 |
| BRSK2     | ENSG00000174672 | protein_coding | 2.298392014 |
| C2orf72   | ENSG00000204128 | protein_coding | 2.29889889  |
| APOBEC4   | ENSG00000173627 | protein_coding | 2.299654986 |
| DNAH8     | ENSG00000124721 | protein_coding | 2.309481824 |
| AFP       | ENSG00000081051 | protein_coding | 2.310606595 |
| SEPTIN12  | ENSG00000140623 | protein_coding | 2.313564887 |
| C2CD4C    | ENSG00000183186 | protein_coding | 2.314149734 |
| FOXL2     | ENSG00000183770 | protein_coding | 2.334568026 |
| CAMKV     | ENSG00000164076 | protein_coding | 2.338437884 |
| MYBL2     | ENSG00000101057 | protein_coding | 2.344509766 |
| NUTM2F    | ENSG00000130950 | protein_coding | 2.344647079 |
| PNLIP     | ENSG00000175535 | protein_coding | 2.346288153 |
| GAL       | ENSG00000069482 | protein_coding | 2.365512558 |
| SERPINA11 | ENSG00000186910 | protein_coding | 2.369092647 |
| OR51E2    | ENSG00000167332 | protein_coding | 2.373481598 |
| HABP2     | ENSG00000148702 | protein_coding | 2.379438386 |
| BARX1     | ENSG00000131668 | protein_coding | 2.382397574 |
| RNF157    | ENSG00000141576 | protein_coding | 2.383780632 |
| APOF      | ENSG00000175336 | protein_coding | 2.391712258 |
| AC013470  | ENSG00000226690 | protein_coding | 2.407196419 |
| SMIM23    | ENSG00000185662 | protein_coding | 2.422860617 |
| NLRP12    | ENSG00000142405 | protein_coding | 2.4231192   |
| H2AC4     | ENSG00000278463 | protein_coding | 2.427609354 |
| KLK12     | ENSG00000186474 | protein_coding | 2.428620588 |
| KNG1      | ENSG00000113889 | protein_coding | 2.441034737 |
| ERG       | ENSG00000157554 | protein_coding | 2.455795326 |
| PPFIA2    | ENSG00000139220 | protein_coding | 2.459222916 |
| HPN       | ENSG00000105707 | protein_coding | 2.462263759 |
| IL1F10    | ENSG00000136697 | protein_coding | 2.466480398 |
| VGF       | ENSG00000128564 | protein_coding | 2.466958536 |
| ZNF556    | ENSG00000172000 | protein_coding | 2.468008517 |
| KRTAP13-1 | ENSG00000182816 | protein_coding | 2.478409059 |
| CERS1     | ENSG00000223802 | protein_coding | 2.500957545 |
| FOXB1     | ENSG00000171956 | protein_coding | 2.512663585 |
| INSM2     | ENSG00000168348 | protein_coding | 2.51463247  |
| MATK      | ENSG00000007264 | protein_coding | 2.522664138 |
| DIO1      | ENSG00000211452 | protein_coding | 2.535333217 |
| H1-5      | ENSG00000184357 | protein_coding | 2.539709087 |
| ANXA10    | ENSG00000109511 | protein_coding | 2.542188099 |
| ZIC3      | ENSG00000156925 | protein_coding | 2.564916455 |
| TBX10     | ENSG00000167800 | protein_coding | 2.570963491 |
| GRIN3A    | ENSG00000198785 | protein_coding | 2.582339532 |
| CCDC78    | ENSG00000162004 | protein_coding | 2.596448803 |
| SLC22A31  | ENSG00000259803 | protein_coding | 2.61244671  |
| TEX55     | ENSG00000163424 | protein_coding | 2.629154898 |
| SOX3      | ENSG00000134595 | protein_coding | 2.64114897  |
| PPP3R2    | ENSG00000188386 | protein_coding | 2.652254493 |
| OR51T1    | ENSG00000176900 | protein_coding | 2.653355216 |
| REG3A     | ENSG00000172016 | protein_coding | 2.655181693 |
| PCDHA1    | ENSG00000204970 | protein_coding | 2.661200356 |
| SLC22A10  | ENSG00000184999 | protein_coding | 2.66313982  |
| ARHGDI3   | ENSG00000242173 | protein_coding | 2.674156402 |
| AKR1C4    | ENSG00000198610 | protein_coding | 2.677460323 |
| H4C2      | ENSG00000278705 | protein_coding | 2.686681979 |

|           |                 |                |             |
|-----------|-----------------|----------------|-------------|
| BARHL2    | ENSG00000143032 | protein_coding | 2.699174996 |
| TERT      | ENSG00000164362 | protein_coding | 2.705289849 |
| C8B       | ENSG00000021852 | protein_coding | 2.710021434 |
| TAS2R38   | ENSG00000257138 | protein_coding | 2.742046371 |
| UGT1A1    | ENSG00000241635 | protein_coding | 2.746585487 |
| A1CF      | ENSG00000148584 | protein_coding | 2.747584277 |
| GNG13     | ENSG00000127588 | protein_coding | 2.759836799 |
| CRYBA4    | ENSG00000196431 | protein_coding | 2.765224036 |
| OOSP2     | ENSG00000149507 | protein_coding | 2.769407467 |
| LINC02203 | ENSG00000280709 | protein_coding | 2.786031659 |
| SCGB2A2   | ENSG00000110484 | protein_coding | 2.790581356 |
| FOXN4     | ENSG00000139445 | protein_coding | 2.796781134 |
| ANKRD66   | ENSG00000230062 | protein_coding | 2.798856951 |
| PRAME     | ENSG00000185686 | protein_coding | 2.81296596  |
| OTP       | ENSG00000171540 | protein_coding | 2.818893594 |
| OR51D1    | ENSG00000197428 | protein_coding | 2.822104902 |
| ACSM1     | ENSG00000166743 | protein_coding | 2.823220381 |
| NLRP13    | ENSG00000173572 | protein_coding | 2.832563613 |
| OR5B2     | ENSG00000172365 | protein_coding | 2.848505106 |
| FGL1      | ENSG00000104760 | protein_coding | 2.851042305 |
| HBQ1      | ENSG00000086506 | protein_coding | 2.86343631  |
| LMX1B     | ENSG00000136944 | protein_coding | 2.868823677 |
| HNF1A     | ENSG00000135100 | protein_coding | 2.875409116 |
| PDX1      | ENSG00000139515 | protein_coding | 2.88383222  |
| CCDC83    | ENSG00000150676 | protein_coding | 2.893935053 |
| CDC20B    | ENSG00000164287 | protein_coding | 2.894733783 |
| POTEC     | ENSG00000183206 | protein_coding | 2.902054356 |
| RPRML     | ENSG00000179673 | protein_coding | 2.932337809 |
| HOXC6     | ENSG00000197757 | protein_coding | 2.933270716 |
| HRG       | ENSG00000113905 | protein_coding | 2.935903347 |
| SLIT1     | ENSG00000187122 | protein_coding | 2.94082738  |
| OR51A7    | ENSG00000176895 | protein_coding | 2.944430671 |
| DLX1      | ENSG00000144355 | protein_coding | 2.944555447 |
| TDRD1     | ENSG00000095627 | protein_coding | 2.956378932 |
| TUBB4A    | ENSG00000104833 | protein_coding | 2.95693336  |
| FGB       | ENSG00000171564 | protein_coding | 2.957179563 |
| SHISA8    | ENSG00000234965 | protein_coding | 2.962118353 |
| AHSG      | ENSG00000145192 | protein_coding | 2.978470271 |
| EPHA8     | ENSG00000070886 | protein_coding | 3.010589481 |
| FABP5     | ENSG00000164687 | protein_coding | 3.015996974 |
| SPZ1      | ENSG00000164299 | protein_coding | 3.026414704 |
| KCNG3     | ENSG00000171126 | protein_coding | 3.029588882 |
| MMP26     | ENSG00000167346 | protein_coding | 3.041549608 |
| SMIM21    | ENSG00000206026 | protein_coding | 3.043517729 |
| IL36RN    | ENSG00000136695 | protein_coding | 3.049000547 |
| KRT73     | ENSG00000186049 | protein_coding | 3.050017658 |
| HELT      | ENSG00000187821 | protein_coding | 3.054486747 |
| KRT20     | ENSG00000171431 | protein_coding | 3.056829642 |
| ARHGAP15  | ENSG00000269891 | protein_coding | 3.061700572 |
| FEZF1     | ENSG00000128610 | protein_coding | 3.068816787 |
| EFNA2     | ENSG00000099617 | protein_coding | 3.097665454 |
| SLCO1B1   | ENSG00000134538 | protein_coding | 3.120866039 |
| POU4F1    | ENSG00000152192 | protein_coding | 3.12276873  |
| HMX1      | ENSG00000215612 | protein_coding | 3.133323363 |
| SLCO1A2   | ENSG00000084453 | protein_coding | 3.158829846 |
| H2BC14    | ENSG00000273703 | protein_coding | 3.163240757 |
| TSPAN19   | ENSG00000231738 | protein_coding | 3.177440112 |
| AMH       | ENSG00000104899 | protein_coding | 3.182594188 |

|           |                 |                |             |
|-----------|-----------------|----------------|-------------|
| NR2E1     | ENSG00000112333 | protein_coding | 3.193057422 |
| APOH      | ENSG00000091583 | protein_coding | 3.206425236 |
| NKX2-5    | ENSG00000183072 | protein_coding | 3.213399493 |
| CTAG2     | ENSG00000126890 | protein_coding | 3.216620262 |
| DLX2      | ENSG00000115844 | protein_coding | 3.218017426 |
| AMACR     | ENSG00000242110 | protein_coding | 3.22445615  |
| TFF3      | ENSG00000160180 | protein_coding | 3.230709624 |
| OR51C1P   | ENSG00000197674 | protein_coding | 3.233259547 |
| KRT72     | ENSG00000170486 | protein_coding | 3.233930833 |
| KISS1R    | ENSG00000116014 | protein_coding | 3.241645998 |
| LYPD8     | ENSG00000259823 | protein_coding | 3.251198426 |
| MARCHF1   | ENSG00000183654 | protein_coding | 3.253701008 |
| HOXC13    | ENSG00000123364 | protein_coding | 3.257825006 |
| ONECUT2   | ENSG00000119547 | protein_coding | 3.279259297 |
| MAGEA1    | ENSG00000198681 | protein_coding | 3.294273211 |
| ANGPTL3   | ENSG00000132855 | protein_coding | 3.299699264 |
| CPN1      | ENSG00000120054 | protein_coding | 3.316210238 |
| UGT1A3    | ENSG00000243135 | protein_coding | 3.321085245 |
| HAO1      | ENSG00000101323 | protein_coding | 3.358845173 |
| ADAM18    | ENSG00000168619 | protein_coding | 3.377663508 |
| SP9       | ENSG00000217236 | protein_coding | 3.394415095 |
| IAPP      | ENSG00000121351 | protein_coding | 3.456817588 |
| MAGEA3    | ENSG00000221867 | protein_coding | 3.476629375 |
| ATP8A2    | ENSG00000132932 | protein_coding | 3.503325299 |
| FOXD1     | ENSG00000251493 | protein_coding | 3.510635705 |
| NKX6-1    | ENSG00000163623 | protein_coding | 3.540355661 |
| SLC18A3   | ENSG00000187714 | protein_coding | 3.567056523 |
| ZNF560    | ENSG00000198028 | protein_coding | 3.571888941 |
| OR51S1    | ENSG00000176922 | protein_coding | 3.583586794 |
| KRTAP20-1 | ENSG00000206105 | protein_coding | 3.603551345 |
| POTEB3    | ENSG00000278522 | protein_coding | 3.609738541 |
| ALB       | ENSG00000163631 | protein_coding | 3.619645404 |
| APCS      | ENSG00000132703 | protein_coding | 3.623412256 |
| SLC17A4   | ENSG00000146039 | protein_coding | 3.664162599 |
| ADAM2     | ENSG00000104755 | protein_coding | 3.669809851 |
| FOXG1     | ENSG00000176165 | protein_coding | 3.685968316 |
| FEZF2     | ENSG00000153266 | protein_coding | 3.687464599 |
| UNC5A     | ENSG00000113763 | protein_coding | 3.688999632 |
| SRARP     | ENSG00000183888 | protein_coding | 3.711153256 |
| CST2      | ENSG00000170369 | protein_coding | 3.799816837 |
| MAGEC1    | ENSG00000155495 | protein_coding | 3.802807636 |
| PHGR1     | ENSG00000233041 | protein_coding | 3.805643976 |
| ATOH1     | ENSG00000172238 | protein_coding | 3.885527857 |
| GC        | ENSG00000145321 | protein_coding | 3.900282278 |
| NKX2-2    | ENSG00000125820 | protein_coding | 3.925744211 |
| SLCO1B3   | ENSG00000111700 | protein_coding | 3.956622559 |
| PDIA2     | ENSG00000185615 | protein_coding | 4.007807642 |
| NETO1     | ENSG00000166342 | protein_coding | 4.094615684 |
| DEFA6     | ENSG00000164822 | protein_coding | 4.102109111 |
| ANKRD34F  | ENSG00000189127 | protein_coding | 4.126486969 |
| B3GNT6    | ENSG00000198488 | protein_coding | 4.132931874 |
| FOXB2     | ENSG00000204612 | protein_coding | 4.163931245 |
| SPINK1    | ENSG00000164266 | protein_coding | 4.19713554  |
| VAX1      | ENSG00000148704 | protein_coding | 4.205147903 |
| NKX2-3    | ENSG00000119919 | protein_coding | 4.285868397 |
| DYTN      | ENSG00000232125 | protein_coding | 4.346890415 |
| MAGEA6    | ENSG00000197172 | protein_coding | 4.369385196 |
| UGT2B4    | ENSG00000156096 | protein_coding | 4.385208701 |

|          |                 |                |             |
|----------|-----------------|----------------|-------------|
| APOC3    | ENSG00000110245 | protein_coding | 4.38876485  |
| ZIC2     | ENSG00000043355 | protein_coding | 4.414947662 |
| PAX1     | ENSG00000125813 | protein_coding | 4.594842522 |
| HOXC12   | ENSG00000123407 | protein_coding | 4.601200444 |
| DEFA5    | ENSG00000164816 | protein_coding | 4.627903266 |
| MAGEC2   | ENSG00000046774 | protein_coding | 4.90910796  |
| COL2A1   | ENSG00000139219 | protein_coding | 4.994354035 |
| COX7B2   | ENSG00000170516 | protein_coding | 5.032926427 |
| ZIC5     | ENSG00000139800 | protein_coding | 5.051963538 |
| LIPF     | ENSG00000182333 | protein_coding | 5.061564801 |
| SLC45A2  | ENSG00000164175 | protein_coding | 5.076408262 |
| ANKRD30A | ENSG00000148513 | protein_coding | 5.138701935 |
| APOA2    | ENSG00000158874 | protein_coding | 5.279690666 |
| GLYATL3  | ENSG00000203972 | protein_coding | 5.526184695 |

Supplementary Dataset File\_2 : 363 low-expressed genes and 287 high-expressed

ssed genes was done using differential expression analysis using  $|\log_2FC| > 2$  and  $FDR < 0.05$ .  
padj

1.06175E-18  
2.10801E-49  
2.81613E-15  
7.02635E-55  
8.37558E-63  
4.1471E-59  
1.43007E-64  
6.18875E-78  
2.35858E-16  
8.47565E-59  
1.08629E-30  
7.6691E-115  
1.23338E-31  
8.2425E-14  
5.3517E-109  
1.76915E-76  
9.69183E-17  
8.5418E-119  
3.9308E-152  
5.12197E-30  
9.86849E-27  
1.1079E-56  
4.5602E-117  
3.6582E-158  
4.34824E-23  
5.05045E-22  
4.06633E-11  
5.24523E-52  
1.79529E-97  
3.47303E-77  
6.95368E-19  
4.57541E-32  
2.58538E-93  
8.90035E-40  
1.7016E-125  
1.70936E-12  
1.28982E-23  
2.80795E-57  
2.5646E-37  
1.9122E-145  
7.70701E-16  
9.43203E-23  
2.25837E-51  
0.009898966  
2.2043E-89  
7.27654E-55  
2.32297E-06  
3.76314E-74  
5.7039E-34  
3.28866E-62  
2.25216E-38  
2.70941E-73  
1.15726E-86  
1.81407E-12  
4.84566E-45  
2.13342E-75

5.16257E-63  
6.51592E-50  
5.77805E-07  
8.50532E-26  
2.45639E-89  
1.07233E-10  
4.35695E-67  
1.46317E-29  
9.2643E-105  
4.31327E-15  
1.03748E-51  
5.28367E-58  
1.01701E-55  
3.38038E-19  
8.22315E-12  
8.0878E-29  
1.1611E-124  
2.92333E-22  
1.02925E-19  
2.37261E-65  
1.21604E-51  
8.53503E-83  
1.98528E-11  
1.0431E-51  
3.9568E-28  
1.55419E-19  
2.21206E-20  
6.76635E-07  
9.3597E-36  
1.3209E-30  
3.54091E-31  
9.59516E-77  
7.4923E-11  
2.909E-94  
1.3272E-16  
1.36006E-41  
6.31283E-67  
9.3679E-104  
1.28383E-26  
2.33166E-19  
3.22392E-43  
4.9089E-11  
9.91909E-26  
1.09707E-48  
5.01204E-09  
6.39342E-05  
4.20462E-19  
7.49172E-11  
1.25978E-19  
4.32573E-26  
1.21951E-14  
4.62714E-25  
1.24859E-37  
1.2497E-21  
8.48377E-39  
1.93467E-10  
0.000415072  
1.71904E-74

2.028E-69  
1.79417E-31  
2.97334E-41  
6.70485E-56  
1.69897E-11  
9.86732E-18  
3.66441E-65  
7.61136E-15  
6.31283E-67  
1.45425E-47  
1.14929E-22  
2.1365E-45  
1.09087E-36  
1.32213E-24  
1.7301E-21  
5.41533E-20  
2.56412E-14  
1.08616E-07  
9.23314E-21  
1.32606E-25  
2.96289E-42  
1.97247E-20  
3.90076E-39  
1.37762E-78  
1.06091E-15  
5.70499E-20  
3.51645E-08  
0.005620589  
0.012940298  
3.76314E-74  
1.56946E-10  
1.07425E-25  
5.07384E-38  
3.39785E-34  
1.22237E-10  
3.91904E-13  
4.62403E-14  
4.37547E-09  
6.33773E-16  
3.30598E-16  
1.99661E-22  
2.6959E-12  
1.18468E-86  
4.82031E-19  
5.9364E-10  
1.69514E-17  
4.22357E-27  
3.86765E-17  
2.65032E-20  
3.89444E-34  
1.17297E-28  
4.76474E-22  
1.40334E-07  
7.83877E-40  
0.007227034  
1.07385E-30  
1.92477E-58  
5.66547E-08

4.07922E-31  
8.94888E-05  
1.82605E-21  
7.76667E-17  
7.29798E-12  
1.36079E-07  
3.70428E-57  
5.43264E-55  
5.24731E-21  
1.47809E-73  
5.25082E-26  
9.81779E-24  
4.48794E-16  
6.24857E-11  
6.72249E-40  
9.23359E-09  
0.001305916  
1.16645E-23  
1.1301E-10  
5.84328E-36  
4.90922E-25  
3.69237E-15  
2.45601E-18  
3.19926E-15  
2.36288E-24  
1.09726E-50  
1.31709E-09  
7.88786E-29  
6.52644E-13  
7.26919E-12  
7.18053E-21  
4.18018E-14  
1.49647E-14  
1.7626E-12  
1.02636E-13  
1.59053E-24  
2.15273E-57  
1.14096E-20  
1.38349E-12  
4.91202E-24  
3.01379E-18  
9.62412E-26  
1.68932E-39  
2.15501E-46  
1.2252E-24  
1.13729E-08  
5.34E-27  
5.16421E-14  
4.28895E-16  
1.15438E-32  
1.10746E-31  
1.15799E-07  
1.9841E-36  
5.87292E-24  
1.57798E-19  
3.33735E-20  
3.22377E-30  
0.000478815



4.58409E-17  
9.07101E-22  
9.64363E-22  
2.14646E-10  
5.81309E-16  
1.02573E-07  
2.20045E-62  
6.0232E-12  
1.45754E-09  
1.49277E-28  
7.37601E-21  
1.75049E-23  
8.0478E-23  
1.20515E-20  
2.02416E-59  
6.05405E-34  
1.55779E-20  
2.6702E-46  
2.42613E-32  
3.34711E-16  
4.47381E-20  
0.004680557  
2.67841E-39  
8.49691E-07  
1.21726E-19  
2.71942E-15  
0.000275236  
7.27145E-18  
2.32132E-12  
1.24546E-21  
8.33403E-32  
8.19795E-60  
2.6488E-41  
1.59128E-05  
5.05255E-21  
2.57181E-22  
2.96404E-16  
3.23852E-16  
1.55573E-11  
8.7375E-19  
1.27467E-14  
9.97035E-20  
5.82533E-26  
9.46629E-28  
4.01085E-15  
2.23924E-20  
4.25364E-07  
1.77254E-51  
3.53972E-31  
1.07394E-12  
6.7473E-15  
3.5939E-12  
1.72194E-27  
1.68519E-07  
7.24134E-33  
1.02659E-11  
1.57578E-07  
7.04939E-15

6.2859E-09  
2.51693E-19  
1.44026E-07  
8.99642E-20  
5.34208E-21  
7.65624E-16  
2.49796E-14  
1.9136E-21  
2.12848E-26  
1.16285E-20  
2.07584E-26  
4.19241E-09  
7.81242E-14  
9.94304E-13  
4.21227E-30  
1.47356E-07  
1.46416E-20  
5.0575E-11  
4.28786E-14  
1.12104E-54  
7.7593E-25  
1.29412E-10  
1.2661E-17  
5.31489E-46  
4.13947E-18  
4.42365E-17  
2.85983E-25  
1.35064E-27  
5.06985E-28  
2.28754E-16  
6.9392E-18  
1.27305E-18  
4.97469E-30  
1.05221E-33  
1.31439E-32  
2.83264E-34  
1.66867E-13  
1.60813E-17  
4.24669E-44  
1.75709E-24  
5.87022E-24  
3.28086E-16  
1.19541E-21  
3.8831E-38  
6.48324E-33  
1.20585E-08  
6.06798E-21  
1.76459E-14  
4.20138E-22  
5.13842E-12  
4.98417E-17  
1.4519E-15  
6.3738E-25  
3.06073E-06  
2.08183E-08  
3.68144E-10  
6.58181E-13  
2.04293E-28

8.3682E-13  
2.2611E-13  
4.52813E-17  
1.6473E-14  
5.41888E-42  
4.58003E-17  
2.66705E-08  
1.46245E-28  
2.52001E-16  
3.71279E-35  
6.41161E-31  
3.85665E-21  
3.2836E-14  
0.000462757  
3.04243E-07  
3.26831E-22  
4.15183E-07  
6.77357E-05  
8.57762E-13  
2.18338E-19  
1.85425E-14  
8.17803E-08  
0.000367995  
5.55511E-07  
2.74555E-11  
1.98286E-11  
0.001163144  
0.000886729  
6.85214E-06  
0.026763401  
5.55474E-25  
0.000477161  
1.76588E-12  
6.69873E-22  
2.53565E-18  
2.84857E-21  
1.99486E-34  
8.05966E-08  
8.89349E-07  
1.21322E-21  
3.87282E-12  
1.13046E-06  
2.66315E-15  
3.23568E-05  
8.94908E-06  
7.50298E-08  
4.92535E-08  
1.00665E-05  
0.002373833  
1.10635E-06  
1.43115E-07  
2.09862E-07  
6.30127E-10  
1.0772E-13  
7.50039E-15  
2.62551E-05  
8.09794E-24  
4.64586E-06

2.10306E-69  
7.21119E-20  
0.035598883  
0.000275653  
1.05656E-36  
0.000148149  
3.87656E-36  
6.75765E-26  
1.83933E-10  
6.37032E-17  
8.2239E-18  
1.55888E-23  
0.000114769  
5.42239E-28  
4.96048E-08  
6.55843E-07  
1.87523E-18  
5.58639E-21  
9.11582E-39  
4.72347E-19  
3.42205E-12  
7.47206E-16  
4.51771E-18  
0.000557423  
5.75979E-09  
0.01642392  
0.000706168  
1.2512E-11  
1.15942E-49  
3.25043E-08  
7.17979E-12  
1.08266E-13  
1.73801E-17  
2.03995E-08  
1.63436E-15  
2.83571E-23  
1.38322E-14  
4.64603E-06  
0.000144823  
7.56948E-24  
6.18076E-14  
3.95378E-10  
1.25249E-19  
3.89327E-09  
5.56556E-29  
1.03475E-06  
2.38778E-30  
2.02586E-14  
6.15436E-10  
1.85564E-06  
1.02718E-11  
2.61654E-33  
1.06485E-18  
3.2682E-19  
0.027414334  
1.25712E-07  
3.2777E-07  
6.90604E-30

1.54453E-17  
1.30473E-08  
5.93395E-09  
1.28776E-21  
3.83051E-18  
4.23046E-32  
2.18667E-07  
4.52241E-15  
5.40821E-09  
3.90437E-17  
5.44316E-31  
1.64361E-16  
2.57641E-09  
1.12057E-29  
2.85162E-16  
6.26459E-08  
1.11556E-27  
1.02636E-13  
6.65047E-22  
3.30541E-13  
2.40398E-13  
8.13768E-24  
4.99756E-27  
2.40194E-16  
4.07359E-09  
1.37697E-29  
6.37235E-11  
8.38367E-14  
1.61683E-07  
7.31487E-16  
9.60561E-14  
1.45734E-61  
1.98529E-08  
2.16733E-21  
1.40955E-11  
1.57529E-08  
4.12828E-30  
5.05671E-08  
5.25426E-09  
8.57873E-32  
2.02869E-16  
2.3951E-11  
2.56995E-16  
2.27111E-07  
5.09691E-16  
2.09007E-15  
1.05733E-29  
4.52999E-19  
0.001573651  
9.9973E-05  
3.45748E-10  
5.63278E-13  
0.039291283  
4.8454E-14  
1.30832E-18  
1.95755E-24  
3.47826E-05  
3.5368E-16

0.001395526  
8.16691E-24  
0.003914315  
7.35773E-05  
1.01644E-06  
4.14402E-11  
5.18776E-23  
3.33859E-08  
0.015044326  
1.12633E-05  
2.00159E-05  
5.60642E-24  
2.32354E-29  
2.72808E-11  
2.5516E-14  
1.16425E-08  
2.09894E-28  
2.36429E-15  
5.08505E-05  
6.324E-18  
2.99406E-15  
3.7546E-38  
6.77962E-12  
5.7491E-07  
2.03924E-26  
2.29338E-12  
7.75131E-06  
2.36292E-16  
5.63368E-52  
4.08881E-05  
7.71913E-37  
3.31892E-09  
2.46426E-26  
2.03318E-22  
4.7639E-22  
8.20817E-05  
6.46392E-28  
3.24767E-06  
3.6017E-27  
2.9547E-24  
6.90088E-12  
3.29498E-28  
1.20677E-32  
2.79329E-10  
3.01891E-15  
3.18052E-10  
2.7271E-08  
1.94297E-17  
3.34034E-27  
3.29828E-15  
5.17026E-21  
3.14311E-10  
2.39195E-09  
1.45289E-08  
6.30203E-21  
1.19266E-11  
8.1093E-25  
1.29445E-27

1.52141E-14  
2.14739E-06  
5.6624E-07  
0.002634674  
2.33004E-32  
1.61582E-46  
3.32014E-25  
1.61835E-25  
2.13685E-12  
6.03757E-18  
9.49055E-12  
4.7103E-17  
1.17512E-15  
7.31428E-43  
0.001577268  
1.55535E-23  
3.48557E-06  
6.85345E-15  
2.5488E-16  
3.33871E-09  
2.5993E-07  
4.45991E-11  
0.000688252  
2.18507E-30  
1.91187E-34  
9.05309E-20  
2.6654E-09  
4.29965E-15  
6.08097E-17  
5.42593E-10  
1.50704E-06  
1.50256E-27  
0.00260679  
4.49193E-13  
1.59764E-26  
4.95045E-07  
6.74175E-08  
9.81052E-28  
1.02957E-22  
3.40397E-32  
0.000618075  
2.312E-37  
3.09827E-17  
5.84878E-08  
1.5947E-22  
2.68006E-20  
7.60505E-34  
8.6726E-21  
0.000210343  
8.09794E-24  
3.41122E-22  
3.01922E-20  
7.72062E-24  
1.97738E-14  
1.56109E-66  
1.55711E-16  
0.000154999  
6.40153E-33

0.00011999  
1.16617E-48  
2.66586E-29  
1.99181E-18  
0.000141387  
5.26594E-06  
1.05591E-31  
8.72845E-05  
8.97611E-43  
2.06482E-08  
1.09383E-59  
5.80509E-18  
2.22387E-08  
2.14261E-09

d genes was done using differential expression analysis using  $|\log_2FC| > 2$  and  $FDR < 0.05$ .
