# Supplementary material for: Mechanism of prognostic marker SPOCK3 affecting malignant progression of prostate cancer and construction of prognostic model
Source: PubMed Central journal article supplement (PMC10416445; doi:10.1186/s12885-023-11151-3), 2023-08-11
Supplement: 12885_2023_11151_MOESM3_ESM.pdf [file 12885_2023_11151_MOESM3_ESM.pdf]

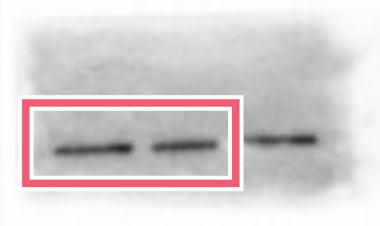

GAPDH 37kDa

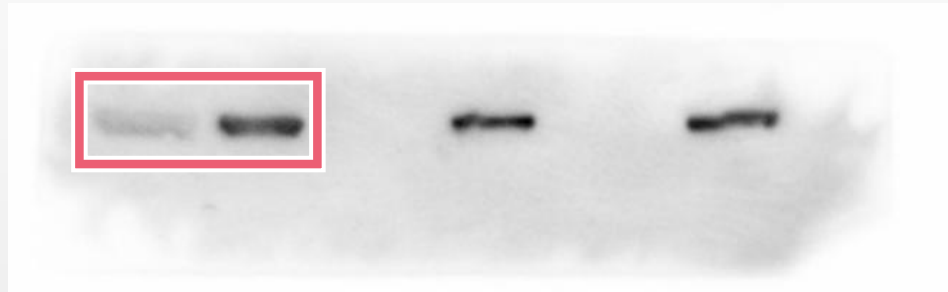

SPOCK3 49kDa

Supplementary Dataset File\_3.Anti- GAPDH and Anti-SPOCK3 for vetor, SPOCK3-1, SPOCK3-2 in DU145.
